# Supplementary material for: DMSO/Tf2O-mediated cross-coupling of tryptamine with substituted aniline to access C3a–N1′-linked pyrroloindoline alkaloids
Source: Royal Society of Chemistry journal article supplement (doi:10.1039/c5ob00190k), 2015-01-01

**Electronic Supplementary Information**

**DMSO/Tf<sub>2</sub>O-Mediated Cross-Coupling of Tryptamine with Aniline to a C3a-N1'-Linked Pyrroloindoline Alkaloid**

Masanori Tayu, Takako Ishizaki, Kazuhiro Higuchi\*, and Tomomi Kawasaki\*

Meiji Pharmaceutical University, 2-522-1 Noshio, Kiyose, Tokyo 204-8588, Japan.

| <b>Contents</b>                                           | <b>Page#</b> |
|-----------------------------------------------------------|--------------|
| General                                                   | S2           |
| Experimental Procedures and Characterization Data         | S2-S13       |
| References                                                | S13          |
| Copies of <sup>1</sup> H- and <sup>13</sup> C-NMR spectra | S14-S33      |

## I. General

All melting points were measured on a Yanagimoto micro melting point apparatus, and are uncorrected. IR spectra were recorded on a Shimadzu IR Prestige-21 spectrophotometer. <sup>1</sup>H and <sup>13</sup>C NMR spectra were measured on a JEOL JNM-AL300 (300 MHz), a JEOL JNM-AL400 (400 MHz), or a JEOL JNM-LA500 (500 MHz) spectrometer with tetramethylsilane as an internal standard. *J*-Values are given in Hertz. Mass spectra were recorded on a JEOL JMS 700 instrument with a direct inlet system. Elemental analyses were obtained using a Yanaco MT-6 elemental analyzer. Column chromatography was carried out on a silica gel [Fuji Silysia Co. Inc. (silica gel PSQ 60B)].

The following compounds were characterized by the previous reports: **10a**,<sup>1)</sup> **10b**,<sup>1)</sup> **12a**,<sup>2)</sup> **12b**,<sup>3)</sup> and **12c**.<sup>4)</sup>

## II. Experimental Procedures and Characterization Data

### General procedure for the synthesis of C3a-nitrogen-substituted pyrroloindolines (Table 1)

Tf<sub>2</sub>O (67 μL, 0.40 mmol, 1.0 equiv) was added to a solution of **10a** (93 mg, 0.40 mmol, 1.0 equiv) and DMSO (28 μL, 0.40 mmol, 1.0 equiv) in DCM (2.0 mL, 0.20 M) at -78 °C under an argon atmosphere. After stirring for 10 min, DTBP (0.18 mL, 0.80 mmol, 2.0 equiv) was added and the reaction mixture was stirred for a further 10 min. The nucleophile (1.0 equiv) was added and then the reaction mixture was warmed to 0 °C over 10 min with stirring. The reaction mixture was neutralized with saturated aqueous NaHCO<sub>3</sub> at 0 °C, and then extracted three times with DCM. The organic layer was washed with brine, dried over MgSO<sub>4</sub>, and concentrated under reduced pressure. The residue was purified by silica gel column chromatography with *n*-hexane/AcOEt as the eluent to afford the corresponding pyrroloindoline **11**.

### For Table 1

#### Methyl 8-methyl-3a-phenylamino-3,3a,8,8a-tetrahydropyrrolo[2,3-*b*]indole-1(2*H*)-carboxylate (**11a**)

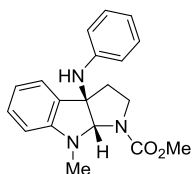

Entry 1: Aniline (37 μL); **11a** (0.12 g, 91%).

White amorphous

IR (CHCl<sub>3</sub>): 3586, 1695, 1603, 1450 cm<sup>-1</sup>.

<sup>1</sup>H NMR (300 MHz, DMSO-*d*<sub>6</sub>, 80 °C): δ 2.11 (1H, ddd, *J* = 13.0, 7.5, 5.5 Hz), 2.39-2.55 (1H, m), 2.93 (3H, s), 3.00-3.20 (1H, m), 3.65 (3H, s), 3.82 (1H, ddd, *J* = 11.0, 7.8, 5.4 Hz), 5.53 (1H, s), 5.94 (1H, s), 6.31-6.41 (2H, m), 6.46-6.56 (2H, m), 6.61 (1H, ddd, *J* = 7.4, 7.4, 1.0 Hz), 6.88-6.98 (2H, m), 7.00 (1H, dd, *J* = 7.4, 1.0 Hz), 7.11 (1H, ddd, *J* = 7.4, 7.4, 1.0 Hz).

<sup>13</sup>C NMR (125 MHz, DMSO-*d*<sub>6</sub>, 80 °C): δ 32.6, 44.0, 51.82, 51.84, 70.8, 84.3, 106.2, 114.0, 116.3, 117.3, 122.0, 128.1, 128.6, 130.0, 145.9, 150.1, 155.1.

MS (EI): *m/z* (%) 323 (M<sup>+</sup>, 41), 232 (14), 231 (100), 230 (13), 171 (11), 144 (21).

HRMS (EI): *m/z* Calcd for C<sub>19</sub>H<sub>21</sub>N<sub>3</sub>O<sub>2</sub>: 323.1634; Found: 323.1632.

**Methyl 8-methyl-3a-((4-nitrophenyl)amino)-3,3a,8,8a-tetrahydropyrrolo[2,3-*b*]indole-1(2*H*)-carboxylate (11b)**

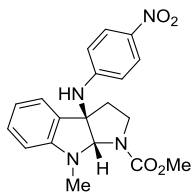

Entry 2: *p*-Nitroaniline (55 mg); **11b** (0.13 g, 90%).

Yellow powder

M. p. 215-216 °C

IR (CHCl<sub>3</sub>): 1713, 1697, 1599, 1506, 1454, 1327, 1314 cm<sup>-1</sup>.

<sup>1</sup>H NMR (500 MHz, DMSO-*d*<sub>6</sub>, 80 °C): δ 2.21 (1H, ddd, *J* = 12.5, 7.0, 5.5 Hz), 2.54 (1H, ddd, *J* = 12.5, 7.0, 7.0 Hz), 2.98 (3H, s), 3.04-3.22 (1H, m), 3.67 (3H, s), 3.85 (1H, ddd, *J* = 12.0, 8.0, 5.5 Hz), 5.56 (1H, s), 6.42-6.51 (2H, m), 6.59 (1H, d, *J* = 7.6 Hz), 6.64 (1H, ddd, *J* = 7.6, 7.6, 1.0 Hz), 7.01 (1H, dd, *J* = 7.6, 1.0 Hz), 7.16 (1H, ddd, *J* = 7.6, 7.6, 1.0 Hz), 7.48 (1H, s), 7.82-7.92 (2H, m).

<sup>13</sup>C NMR (125 MHz, DMSO-*d*<sub>6</sub>, 80 °C): δ 32.3, 44.0, 51.9, 52.0, 70.7, 84.3, 106.5, 112.6, 117.5, 122.0, 125.0, 128.3, 129.2, 136.8, 150.1, 151.9, 154.9.

MS (EI): *m/z* (%) 368 (M<sup>+</sup>, 54), 232 (14), 231 (100), 171 (10), 144 (21).

HRMS (EI): *m/z* Calcd for C<sub>19</sub>H<sub>20</sub>N<sub>4</sub>O<sub>4</sub>: 368.1485; Found: 368.1479.

**Methyl 3a-((4-cyanophenyl)amino)-8-methyl-3,3a,8,8a-tetrahydropyrrolo[2,3-*b*]indole-1(2*H*)-carboxylate (11c)**

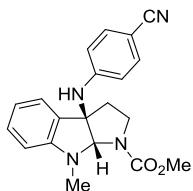

Entry 3: *p*-Cyanoaniline (47 mg); **11c** (0.13 g, 96%).

White amorphous

IR (CHCl<sub>3</sub>): 2218, 1697, 1607, 1518 cm<sup>-1</sup>.

<sup>1</sup>H NMR (500 MHz, DMSO-*d*<sub>6</sub>, 80 °C): δ 2.17 (1H, ddd, *J* = 13.0, 7.5, 5.5 Hz), 2.43-2.57 (1H, m), 2.96 (3H, s), 3.05-3.22 (1H, m), 3.66 (3H, s), 3.77-3.92 (1H, m), 5.53 (1H, s), 6.38-6.50 (2H, m), 6.57 (1H, d, *J* = 7.6 Hz), 6.63 (1H, dd, *J* = 7.6, 7.6 Hz), 7.00 (1H, d, *J* = 7.6 Hz), 7.02 (1H, br s), 7.14 (1H, ddd, *J* = 7.6, 7.6, 1.2 Hz), 7.26-7.39 (2H, m).

<sup>13</sup>C NMR (125 MHz, DMSO-*d*<sub>6</sub>, 80 °C): δ 32.3, 39.6, 44.0, 51.9, 70.5, 84.2, 97.2, 106.4, 113.6, 117.5, 119.5, 122.0, 128.6, 129.0, 132.5, 149.6, 150.0, 154.9.

MS (EI): *m/z* (%) 348 (M<sup>+</sup>, 42), 232 (16), 231 (100), 171 (12), 144 (22).

HRMS (EI): *m/z* Calcd for C<sub>20</sub>H<sub>20</sub>N<sub>4</sub>O<sub>2</sub>: 348.1586; Found: 348.1587.

**Methyl 3a-((4-(methoxycarbonyl)phenyl)amino)-8-methyl-3,3a,8,8a-tetrahydropyrrolo[2,3-*b*]indole-1(2*H*)-carboxylate (11d)**

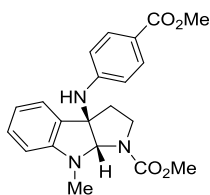

Entry 4: *p*-Methoxycarbonylaniline (60 mg); **11d** (0.14 g, 93%).

White amorphous

IR (CHCl<sub>3</sub>): 1705, 1697, 1607, 1520, 1452 cm<sup>-1</sup>.

<sup>1</sup>H NMR (400 MHz, DMSO-*d*<sub>6</sub>, 80 °C): δ 2.17 (1H, ddd, *J* = 12.8, 7.6, 5.6 Hz), 2.42-2.58 (1H, m), 2.97 (3H, s), 3.03-3.22 (1H, m), 3.66 (3H, s), 3.71 (3H, s), 3.84 (1H, ddd, *J* = 12.0, 7.6, 5.6 Hz), 5.55 (1H, s), 6.33-6.48 (2H, m), 6.56 (1H, d, *J* = 7.6 Hz), 6.62 (1H, dd, *J* = 7.6, 7.6 Hz), 6.82 (1H, br s), 7.00 (1H, dd, *J* = 7.6, 1.2 Hz), 7.13 (1H, ddd, *J* = 7.6, 7.6, 1.2 Hz), 7.48-7.67 (2H, m).

<sup>13</sup>C NMR (100 MHz, DMSO-*d*<sub>6</sub>, 80 °C): δ 32.4, 39.6, 44.0, 50.6, 51.9, 70.6, 84.4, 106.3, 112.9, 117.1, 117.4, 122.0, 128.9, 129.0, 130.0, 150.09, 150.11, 154.9, 165.8.

MS (EI): *m/z* (%) 381 (M<sup>+</sup>, 32), 232 (15), 231 (100), 230 (12), 171 (11), 144 (18).

HRMS (EI): *m/z* Calcd for C<sub>21</sub>H<sub>23</sub>N<sub>3</sub>O<sub>4</sub>: 381.1689; Found: 381.1689.

**Methyl 3a-((4-bromophenyl)amino)-8-methyl-3,3a,8,8a-tetrahydropyrrolo[2,3-*b*]indole-1(2*H*)-carboxylate (11e)**

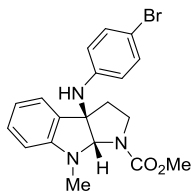

Entry 5: *p*-Bromoaniline (69 mg); **11e** (0.14 g, 89%).

Yellowish solid

M. p. 173-174 °C

IR (CHCl<sub>3</sub>): 1697, 1493, 1450 cm<sup>-1</sup>.

<sup>1</sup>H NMR (500 MHz, DMSO-*d*<sub>6</sub>, 80 °C): δ 2.12 (1H, ddd, *J* = 13.0, 7.5, 5.5 Hz), 2.44 (1H, ddd, *J* = 15.0, 5.5, 5.5 Hz), 2.93 (3H, s), 3.03-3.20 (1H, m), 3.65 (3H, s), 3.81 (1H, ddd, *J* = 13.0, 7.5, 4.5 Hz), 5.50 (1H, s), 6.25 (1H, s), 6.27-6.34 (2H, m), 6.54 (1H, d, *J* = 7.6 Hz), 6.62 (1H, ddd, *J* = 7.6, 7.6, 1.2 Hz), 6.98 (1H, dd, *J* = 7.6, 1.2 Hz), 7.03-7.09 (2H, m), 7.12 (1H, ddd, *J* = 7.6, 7.6, 1.2 Hz).

<sup>13</sup>C NMR (125 MHz, DMSO-*d*<sub>6</sub>, 80 °C): δ 32.4, 32.5, 44.0, 51.9, 71.0, 84.3, 106.3, 107.5, 115.9, 117.3, 122.0, 128.8, 129.3, 130.7, 145.2, 150.1, 155.0.

Anal Calcd for C<sub>19</sub>H<sub>20</sub>N<sub>3</sub>O<sub>2</sub>Br: C, 56.73; H, 5.01; N, 10.45; Found: C, 56.94; H, 5.13; N, 10.22.

**Methyl 8-methyl-3a-((4-methylphenyl)amino)-3,3a,8,8a-tetrahydropyrrolo[2,3-*b*]indole-1(2*H*)-carboxylate (11f)**

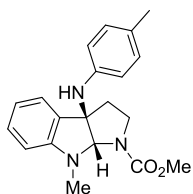

Entry 6: *p*-Toluidine (43 mg); **11f** (0.10 g, 74%).

Yellowish solid

M. p. 125-126 °C

IR (CHCl<sub>3</sub>): 1694, 1612, 1518, 1450, 1387 cm<sup>-1</sup>.

<sup>1</sup>H NMR (500 MHz, DMSO-*d*<sub>6</sub>, 80 °C): δ 2.07 (3H, s), 2.10 (1H, ddd, *J* = 13.0, 7.5, 5.5 Hz), 2.43 (1H, ddd, *J* = 13.0, 7.5, 7.5 Hz), 2.92 (3H, s), 3.01-3.20 (1H, m), 3.65 (3H, s), 3.81 (1H, ddd, *J* = 11.5, 7.5, 5.5 Hz), 5.51 (1H, s), 5.74 (1H, s), 6.23-6.31 (2H, m), 6.52 (1H, d, *J* = 7.6 Hz), 6.60 (1H, ddd, *J* = 7.6, 7.6, 1.2 Hz), 6.71-6.78 (2H, m), 6.99 (1H, dd, *J* = 7.6, 1.2 Hz), 7.10 (1H, ddd, *J* = 7.6, 7.6, 1.2 Hz).

<sup>13</sup>C NMR (125 MHz, DMSO-*d*<sub>6</sub>, 80 °C): δ 19.41, 19.43, 32.6, 44.0, 51.8, 71.0, 84.3, 106.2, 114.4, 117.2, 122.0, 124.9, 128.5, 128.6, 130.3, 143.5, 150.1, 155.0.

Anal Calcd for C<sub>20</sub>H<sub>23</sub>N<sub>3</sub>O<sub>2</sub>: C, 71.19; H, 6.87; N, 12.45; Found: C, 71.03; H, 6.90; N, 12.23.

**Methyl 3a-((4-methoxyphenyl)amino)-8-methyl-3,3a,8,8a-tetrahydropyrrolo[2,3-*b*]indole-1(2*H*)-carboxylate (11g)**

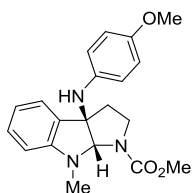

Entry 7: *p*-Anisidine (49 mg); **11g** (54 mg, 38%).

Brown amorphous

IR (CHCl<sub>3</sub>): 1697, 1609, 1510, 1450, 1387 cm<sup>-1</sup>.

<sup>1</sup>H NMR (500 MHz, DMSO-*d*<sub>6</sub>, 80 °C): δ 2.09 (1H, ddd, *J* = 13.0, 7.5, 5.5 Hz), 2.40 (1H, ddd, *J* = 13.0, 7.5, 7.5 Hz), 2.90 (3H, s), 3.01-3.20 (1H, m), 3.58 (3H, s), 3.65 (3H, s), 3.80 (1H, ddd, *J* = 11.0, 7.5, 5.0 Hz), 5.47 (1H, s), 5.56 (1H, s), 6.28-6.36 (2H, m), 6.51 (1H, d, *J* = 7.6 Hz), 6.55-6.59 (2H, m), 6.61 (1H, ddd, *J* = 7.6, 7.6, 1.2 Hz), 7.00 (1H, dd, *J* = 7.6, 1.2 Hz), 7.10 (1H, ddd, *J* = 7.6, 7.6, 1.2 Hz).

<sup>13</sup>C NMR (125 MHz, DMSO-*d*<sub>6</sub>, 80 °C): δ 32.6, 44.0, 51.8, 55.0, 59.9, 71.2, 84.3, 106.2, 114.1, 115.8, 117.2, 122.1, 128.5, 130.3, 139.8, 150.2, 151.3, 155.1.

MS (EI): *m/z* (%) 353 (M<sup>+</sup>, 35), 232 (14), 231 (100), 230 (43), 171 (12), 144 (19).

HRMS (EI): *m/z* Calcd for C<sub>20</sub>H<sub>23</sub>N<sub>3</sub>O<sub>3</sub>: 353.1739; Found: 353.1738.

**Methyl 8-methyl-3a-(methyl(phenyl)amino)-3,3a,8,8a-tetrahydropyrrolo[2,3-*b*]indole-1(2*H*)-carboxylate (11h)**

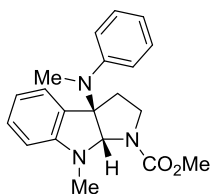

Entry 8: *N*-Methylaniline (44  $\mu$ L); **11h** (0.11 g, 83%).

Colorless oil

IR (CHCl<sub>3</sub>): 1694, 1491, 1450, 1391 cm<sup>-1</sup>.

<sup>1</sup>H NMR (300 MHz, DMSO-*d*<sub>6</sub>, 80 °C):  $\delta$  2.11 (1H, ddd, *J* = 12.5, 6.0, 2.5 Hz), 2.38-2.51 (1H, m), 2.68 (3H, s), 2.77 (3H, s), 2.82 (1H, ddd, *J* = 10.5, 10.5, 6.0 Hz), 3.51-3.68 (1H, m), 3.63 (3H, s), 5.47 (1H, s), 6.43 (1H, d, *J* = 7.9 Hz), 6.66 (1H, ddd, *J* = 7.4, 7.4, 1.0 Hz), 6.90-6.98 (2H, m), 6.98-7.06 (1H, m), 7.07-7.14 (2H, m), 7.14-7.24 (2H, m).

<sup>13</sup>C NMR (125 MHz, DMSO-*d*<sub>6</sub>, 80 °C):  $\delta$  32.1, 36.5, 38.5, 44.7, 51.7, 77.1, 83.0, 106.1, 116.9, 123.40, 123.42, 125.2, 127.9, 128.3, 128.9, 149.6, 150.9, 154.5.

MS (EI): *m/z* (%) 337 (M<sup>+</sup>, 25), 249 (12), 232 (15), 231 (100), 230 (37), 171 (23), 144 (24).

HRMS (EI): *m/z* Calcd for C<sub>20</sub>H<sub>23</sub>N<sub>3</sub>O<sub>2</sub>: 337.1790; Found: 337.1789.

**Methyl 3a-(isopropyl(phenyl)amino)-8-methyl-3,3a,8,8a-tetrahydropyrrolo[2,3-*b*]indole-1(2*H*)-carboxylate (11i)**

**Methyl 3a-(4-(isopropylamino)phenyl)-8-methyl-3,3a,8,8a-tetrahydropyrrolo[2,3-*b*]indole-1(2*H*)-carboxylate (11j)**

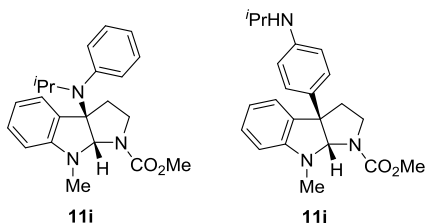

Entry 9: *N*-Isopropylaniline (58  $\mu$ L); **11i** (48 mg, 33%) and **11j** (58 mg, 40%).

**11i**; Colorless oil

IR (CHCl<sub>3</sub>): 1692, 1605, 1491, 1450, 1387 cm<sup>-1</sup>.

<sup>1</sup>H NMR (500 MHz, DMSO-*d*<sub>6</sub>, 80 °C):  $\delta$  0.84 (3H, d, *J* = 6.7 Hz), 0.90 (3H, d, *J* = 6.7 Hz), 1.97 (1H, ddd, *J* = 13.0, 6.3, 2.6 Hz), 2.18 (1H, ddd, *J* = 15.0, 6.3, 5.6 Hz), 2.67-2.79 (1H, m), 2.83 (3H, s), 3.40 (1H, ddd, *J* = 13.0, 6.5, 6.5 Hz), 3.48-3.59 (1H, m), 3.65 (3H, s), 5.44 (1H, s), 6.47 (1H, d, *J* = 7.6 Hz), 6.68 (1H, dd, *J* = 7.6, 7.6 Hz), 6.95-7.05 (2H, m), 7.08-7.14 (1H, m), 7.14-7.20 (1H, m), 7.21-7.34 (3H, m).

<sup>13</sup>C NMR (100 MHz, DMSO-*d*<sub>6</sub>, 80 °C):  $\delta$  22.0, 23.4, 32.3, 37.2, 44.2, 48.2, 51.8, 77.7, 85.1, 106.2, 117.1, 123.3, 125.0, 127.7, 128.7, 130.6, 131.4, 143.3, 150.8, 154.7.

MS (EI): *m/z* (%) 365 (M<sup>+</sup>, 25), 232 (15), 231 (100), 230 (17), 171 (12), 144 (15).

HRMS (EI): *m/z* Calcd for C<sub>22</sub>H<sub>27</sub>N<sub>3</sub>O<sub>2</sub>: 365.2103; Found: 365.2101.

**11j**; Colorless oil

IR (CHCl<sub>3</sub>): 1694, 1605, 1518, 1491, 1449, 1385 cm<sup>-1</sup>.

<sup>1</sup>H NMR (500 MHz, DMSO-*d*<sub>6</sub>, 80 °C): δ 1.11 (6H, d, *J* = 6.4 Hz), 2.26-2.38 (1H, m), 2.41-2.57 (1H, m), 2.83-3.02 (1H, m), 2.90 (3H, s), 3.48 (1H, ddd, *J* = 13.0, 6.5, 6.5 Hz), 3.64 (3H, s), 3.83 (1H, ddd, *J* = 10.5, 7.0, 2.5 Hz), 5.01 (1H, br s), 5.40 (1H, s), 6.46 (1H, d, *J* = 7.6 Hz), 6.47-6.54 (2H, m), 6.60 (1H, ddd, *J* = 7.6, 7.6, 1.2 Hz), 6.90 (1H, d, *J* = 7.6 Hz), 6.95-7.02 (2H, m), 7.04 (1H, ddd, *J* = 7.6, 7.6, 1.2 Hz).

<sup>13</sup>C NMR (125 MHz, DMSO-*d*<sub>6</sub>, 80 °C): δ 22.1, 31.9, 36.9, 42.9, 45.8, 51.7, 59.0, 88.5, 105.8, 112.2, 117.1, 122.8, 126.0, 127.6, 130.4, 133.5, 146.5, 149.9, 154.7.

MS (EI): *m/z* (%) 365 (M<sup>+</sup>, 100), 350 (10), 278 (16), 277 (68), 263 (20).

HRMS (EI): *m/z* Calcd for C<sub>22</sub>H<sub>27</sub>N<sub>3</sub>O<sub>2</sub>: 365.2103; Found: 365.2102.

**Methyl 3a-(diphenylamino)-8-methyl-3,3a,8,8a-tetrahydropyrrolo[2,3-*b*]indole-1(2*H*)-carboxylate (11k)**

**Methyl 8-methyl-3a-(4-(phenylamino)phenyl)-3,3a,8,8a-tetrahydropyrrolo[2,3-*b*]indole-1(2*H*)-carboxylate (11l)**

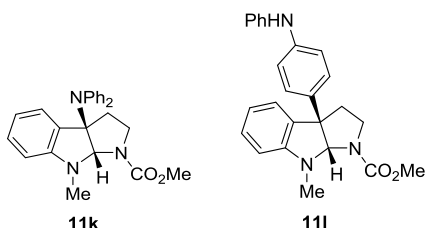

Entry 10: Diphenylamine (68 mg); **11k** (0.12 g, 76%) and **11l** (10 mg, 6%).

**11k**; White amorphous

IR (CHCl<sub>3</sub>): 1697, 1489, 1450, 1385 cm<sup>-1</sup>.

<sup>1</sup>H NMR (500 MHz, DMSO-*d*<sub>6</sub>, 80 °C): δ 2.02 (1H, ddd, *J* = 13.0, 8.0, 5.0 Hz), 2.56 (1H, ddd, *J* = 13.0, 7.0, 7.0 Hz), 2.88-2.99 (1H, m), 2.94 (3H, s), 3.21-3.44 (1H, m), 3.67 (3H, s), 5.93 (1H, s), 6.52 (1H, d, *J* = 7.6 Hz), 6.57 (1H, ddd, *J* = 7.6, 7.6, 1.2 Hz), 6.76-6.84 (4H, m), 6.94-7.01 (2H, m), 7.05 (1H, dd, *J* = 7.6, 1.2 Hz), 7.09 (1H, ddd, *J* = 7.6, 7.6, 1.2 Hz), 7.13-7.25 (4H, m).

<sup>13</sup>C NMR (125 MHz, DMSO-*d*<sub>6</sub>, 80 °C): δ 32.4, 38.0, 44.2, 51.9, 75.7, 84.3, 106.3, 117.1, 122.4, 122.9, 124.9, 128.4, 128.7, 130.1, 146.3, 149.7, 154.8.

MS (EI): *m/z* (%) 399 (M<sup>+</sup>, 15), 311 (13), 232 (14), 231 (100), 230 (22), 171 (13), 144 (18).

HRMS (EI): *m/z* Calcd for C<sub>25</sub>H<sub>25</sub>N<sub>3</sub>O<sub>2</sub>: 399.1947; Found: 399.1945.

**11l**; White amorphous

IR (CHCl<sub>3</sub>): 1715, 1651, 1645, 1557, 1539, 1506 cm<sup>-1</sup>.

<sup>1</sup>H NMR (300 MHz, DMSO-*d*<sub>6</sub>, 80 °C): δ 2.38 (1H, ddd, *J* = 12.3, 6.0, 2.6 Hz), 2.45-2.59 (1H, m), 2.90-3.00 (1H, m), 2.92 (3H, s), 3.11 (1H, br s), 3.65 (3H, s), 3.86 (1H, ddd, *J* = 11.0, 7.5, 2.6 Hz), 5.46 (1H, s), 6.48 (1H, d, *J* = 7.9 Hz), 6.62 (1H, ddd, *J* = 7.3, 7.3, 1.0 Hz), 6.74-6.84 (1H, m), 6.90-7.10 (6H, m), 7.10-7.24 (4H, m).

$^{13}\text{C}$  NMR (125 MHz, DMSO- $d_6$ , 80 °C):  $\delta$  31.9, 36.8, 45.8, 51.8, 59.2, 88.3, 105.9, 116.6, 116.7, 117.2, 119.3, 122.9, 126.2, 127.9, 128.6, 133.1, 134.9, 142.0, 143.3, 149.9, 154.8.

MS (EI):  $m/z$  (%) 399 ( $\text{M}^+$ , 26), 367 (12), 312 (24), 311 (100), 219 (40), 218 (24).

HRMS (EI):  $m/z$  Calcd for  $\text{C}_{25}\text{H}_{25}\text{N}_3\text{O}_2$ : 399.1947; Found: 399.1945.

### Methyl 3a-benzylamino-8-methyl-3,3a,8,8a-tetrahydropyrrolo[2,3-*b*]indole-1(2*H*)-carboxylate (**11m**)

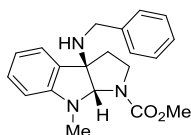

Entry 11: Benzylamine (44  $\mu\text{L}$ ); **11m** (40 mg, 30%).

Colorless oil

IR ( $\text{CHCl}_3$ ): 1694, 1609, 1495, 1450, 1389  $\text{cm}^{-1}$ .

$^1\text{H}$  NMR (300 MHz, DMSO- $d_6$ , 80 °C):  $\delta$  2.00-2.29 (2H, m), 2.73-3.03 (2H, m), 2.86 (3H, s), 3.38 (1H, d,  $J = 13.4$  Hz), 3.50 (1H, d,  $J = 13.4$  Hz), 3.65 (3H, s), 3.76 (1H, ddd,  $J = 11.4, 7.5, 3.9$  Hz), 5.25 (1H, s), 6.46 (1H, d,  $J = 7.9$  Hz), 6.68 (1H, t,  $J = 7.3$  Hz), 7.10 (1H, td,  $J = 7.7, 1.3$  Hz), 7.14-7.32 (6H, m).

$^{13}\text{C}$  NMR (75 MHz, DMSO- $d_6$ , 80 °C):  $\delta$  32.5, 38.2, 44.5, 47.5, 51.6, 73.7, 84.9, 106.0, 117.0, 122.7, 125.9, 127.4, 127.5, 128.5, 129.7, 140.7, 150.9, 153.2.

MS (EI):  $m/z$  (%) 337 ( $\text{M}^+$ , 100), 249 (10), 246 (39), 235 (14), 234 (18), 232 (40), 231 (15), 230 (12), 214 (20), 203 (11), 186 (20), 171 (14), 159 (19), 145 (21), 144 (35), 91 (22).

HRMS (EI):  $m/z$  Calcd for  $\text{C}_{20}\text{H}_{23}\text{N}_3\text{O}_2$ : 337.1790; Found: 337.1788.

### Methyl 3a-diethylamino-8-methyl-3,3a,8,8a-tetrahydropyrrolo[2,3-*b*]indole-1(2*H*)-carboxylate (**11n**)

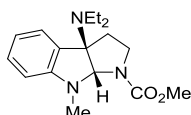

Entry 12: Diethylamine (41  $\mu\text{L}$ ); **11n** (11 mg, 9%).

Colorless oil

IR ( $\text{CHCl}_3$ ): 1694, 1605, 1491, 1450, 1393  $\text{cm}^{-1}$ .

$^1\text{H}$  NMR (300 MHz, DMSO- $d_6$ , 80 °C):  $\delta$  0.94 (6H, t,  $J = 7.1$  Hz), 2.12 (1H, ddd,  $J = 11.0, 6.0, 1.9$  Hz), 2.26 (1H, ddd,  $J = 11.0, 11.0, 8.0$  Hz), 2.43-2.59 (4H, m), 2.76 (1H, ddd,  $J = 11.0, 11.0, 6.0$  Hz), 2.87 (3H, s), 3.66 (3H, s), 3.75 (1H, ddd,  $J = 11.0, 8.0, 1.9$  Hz), 5.21 (1H, s), 6.43 (1H, d,  $J = 7.6$  Hz), 6.63 (1H, ddd,  $J = 7.6, 7.6, 1.2$  Hz), 7.07-7.17 (1H, m), 7.07 (1H, dd,  $J = 7.6, 1.2$  Hz).

$^{13}\text{C}$  NMR (125 MHz, DMSO- $d_6$ , 80 °C):  $\delta$  15.2, 31.8, 36.9, 43.6, 44.4, 51.7, 78.4, 83.5, 105.7, 116.8, 123.3, 128.6, 129.1, 151.1, 154.5.

MS (EI):  $m/z$  (%) 303 ( $\text{M}^+$ , 80), 288 (12), 232 (21), 231 (100), 202 (10), 201 (15), 171 (14), 144 (30).

HRMS (EI):  $m/z$  Calcd for  $\text{C}_{17}\text{H}_{25}\text{N}_3\text{O}_2$ : 303.1947; Found: 303.1946.



### General procedure for the synthesis of 3a-(1-indolyl)pyrroloindolines (Table 2)

Tf<sub>2</sub>O (1.0 equiv) was added to a solution of **10a** (1.0 equiv) and DMSO (1.0 equiv) in DCM (0.20 M) at -78 °C under an argon atmosphere. After stirring for 10 min, DTBP (2.0 equiv) was added and the reaction mixture was stirred for a further 10 min. The nucleophile (1.0 equiv) was added and then the reaction mixture was warmed to 0 °C and stirred for 10 min. Subsequently DDQ (1.0 equiv) was added to the solution and stirred 15 min under same temperature. The reaction mixture was filtrated through Celite pad, and the filtrate was washed with 10% aqueous NaHCO<sub>3</sub>. The organic layer were washed with brine, dried over MgSO<sub>4</sub>, and concentrated under reduced pressure. The residue was purified by column chromatography with *n*-hexane/AcOEt (2:1 to 1:1) as an eluent to give **11**.

### Methyl 3a-(3-(2-((methoxycarbonyl)amino)ethyl)-1*H*-indol-1-yl)-8-methyl-3,3a,8,8a-tetrahydropyrrolo[2,3-*b*]indole-1(2*H*)-carboxylate (**11o**)

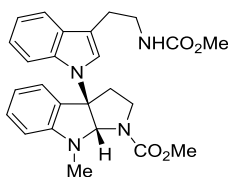

Entry 1; **10a** (93 mg, 0.40 mmol), DMSO (28  $\mu$ L, 0.40 mmol), Tf<sub>2</sub>O (67  $\mu$ L, 0.40 mmol), DTBP (0.18 mL, 0.80 mmol), DCM (2.0 mL), **12a** (88 mg, 0.40 mmol); **11o** (84 mg, 47%).

White amorphous

IR (CHCl<sub>3</sub>): 1703, 1609, 1518, 1450, 1387 cm<sup>-1</sup>.

<sup>1</sup>H NMR (500 MHz, DMSO-*d*<sub>6</sub>, 80 °C):  $\delta$  2.58 (1H, ddd, *J* = 9.0, 4.5, 4.5 Hz), 2.78-2.87 (2H, m), 3.01 (3H, s), 3.10-3.22 (2H, m), 3.24-3.34 (2H, m), 3.53 (3H, s), 3.66 (3H, s), 3.95-4.06 (1H, m), 5.80 (1H, s), 6.59-6.67 (2H, m), 6.88 (1H, br s), 6.93-7.04 (4H, m), 7.19 (1H, ddd, *J* = 7.6, 7.6, 1.2 Hz), 7.34 (1H, s), 7.50-7.57 (1H, m).

<sup>13</sup>C NMR (100 MHz, DMSO-*d*<sub>6</sub>, 80 °C):  $\delta$  24.9, 31.8, 36.9, 40.6, 44.8, 50.7, 52.0, 73.9, 85.3, 106.6, 111.1, 111.8, 117.5, 118.55, 118.62, 121.0, 122.9, 123.7, 127.6, 129.2, 129.7, 134.9, 149.9, 154.7, 156.3.

MS (EI): *m/z* (%) 448 (M<sup>+</sup>, 21), 232 (14), 231 (100), 230 (29), 171 (11), 144 (18).

HRMS (EI): *m/z* Calcd for C<sub>25</sub>H<sub>28</sub>N<sub>4</sub>O<sub>4</sub>: 448.2111; Found: 448.2110.

### Methyl 3a-(5-bromo-3-(2-((methoxycarbonyl)amino)ethyl)-1*H*-indol-1-yl)-8-methyl-3,3a,8,8a-tetrahydropyrrolo[2,3-*b*]indole-1(2*H*)-carboxylate (**11p**)

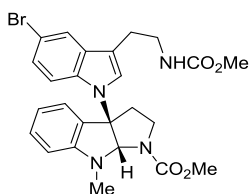

Entry 2; **10a** (93 mg, 0.40 mmol), DMSO (28  $\mu$ L, 0.40 mmol), Tf<sub>2</sub>O (67  $\mu$ L, 0.40 mmol), DTBP (0.18 mL, 0.80 mmol), DCM (2.0 mL), **12b** (0.12 g, 0.40 mmol); **11p** (0.19 g, 91%).

White amorphous

IR (CHCl<sub>3</sub>): 1715, 1699, 1609, 1520, 1454, 1387 cm<sup>-1</sup>.

<sup>1</sup>H NMR (500 MHz, DMSO-*d*<sub>6</sub>, 80 °C): δ 2.54-2.65 (1H, m), 2.80 (2H, t, *J* = 7.2 Hz), 3.00 (3H, s), 3.06-3.19 (2H, m), 3.26 (2H, td, *J* = 7.2, 7.2 Hz), 3.53 (3H, s), 3.66 (3H, s), 3.94-4.06 (1H, m), 5.76 (1H, s), 6.59-6.69 (2H, m), 6.87 (1H, br s), 6.91 (1H, d, *J* = 8.6 Hz), 6.96 (1H, d, *J* = 7.6 Hz), 7.11 (1H, dd, *J* = 8.6, 2.1 Hz), 7.20 (1H, ddd, *J* = 7.6, 7.6, 1.0 Hz), 7.42 (1H, s), 7.70 (1H, d, *J* = 2.1 Hz).

<sup>13</sup>C NMR (125 MHz, DMSO-*d*<sub>6</sub>, 80 °C): δ 24.7, 31.7, 36.9, 40.6, 44.8, 50.7, 52.0, 74.0, 85.3, 106.7, 111.6, 111.7, 113.0, 117.6, 120.9, 122.9, 123.5, 125.5, 127.3, 129.9, 131.1, 133.6, 149.9, 154.6, 156.3.

MS (EI): *m/z* (%) 528 (M<sup>+2</sup>, 7), 526 (M<sup>+</sup>, 6), 232 (14), 231 (100), 230 (14), 171 (10), 144 (16).

HRMS (EI): *m/z* Calcd for C<sub>25</sub>H<sub>27</sub>N<sub>4</sub>O<sub>4</sub>Br: 526.1216; Found: 526.1211.

**Methyl 9-(1-(methoxycarbonyl)-8-methyl-2,3,8,8a-tetrahydropyrrolo[2,3-*b*]indol-3a(1*H*)-yl)-1,3,4,9-tetrahydro-2*H*-pyrido[3,4-*b*]indole-2-carboxylate (11q)**

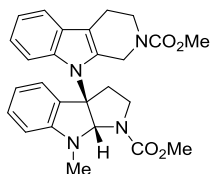

Entry 3; **10a** (46 mg, 0.20 mmol), DMSO (14 μL, 0.20 mmol), Tf<sub>2</sub>O (34 μL, 0.20 mmol), DTBP (90 μL, 0.40 mmol), DCM (1.0 mL), **12c** (46 mg, 0.20 mmol); **11q** (55 mg, 60%).

White amorphous

IR (CHCl<sub>3</sub>): 1694, 1609, 1449, 1381 cm<sup>-1</sup>.

<sup>1</sup>H NMR (500 MHz, DMSO-*d*<sub>6</sub>, 80 °C): δ 2.61-2.86 (3H, m), 2.92-3.07 (1H, m), 3.03 (3H, s), 3.18 (1H, ddd, *J* = 11.5, 11.5, 8.0 Hz), 3.54 (1H, ddd, *J* = 13.5, 8.0, 5.5 Hz), 3.62 (3H, s), 3.67 (3H, s), 3.81 (1H, ddd, *J* = 13.0, 5.5, 5.5 Hz), 4.07 (1H, dd, *J* = 9.8, 8.0 Hz), 4.52 (1H, d, *J* = 16.0 Hz), 4.70 (1H, d, *J* = 16.0 Hz), 6.00 (1H, s), 6.60 (1H, d, *J* = 7.6 Hz), 6.62 (1H, d, *J* = 7.6 Hz), 7.00 (1H, dd, *J* = 7.6, 7.6 Hz), 7.02-7.10 (2H, m), 7.18 (1H, dd, *J* = 7.6, 7.6 Hz), 7.29 (1H, d, *J* = 7.6 Hz), 7.39 (1H, d, *J* = 7.6 Hz).

<sup>13</sup>C NMR (125 MHz, DMSO-*d*<sub>6</sub>, 80 °C): δ 20.5, 30.8, 38.6, 40.7, 43.6, 44.5, 52.0, 52.1, 75.7, 84.8, 105.9, 109.8, 111.3, 117.4, 117.6, 118.9, 121.5, 123.4, 127.4, 130.0, 132.8, 136.05, 136.11, 150.0, 154.3, 155.2.

MS (EI): *m/z* (%) 460 (M<sup>+</sup>, 18), 232 (16), 231 (100), 230 (45), 171 (13), 144 (23).

HRMS (EI): *m/z* Calcd for C<sub>26</sub>H<sub>28</sub>N<sub>4</sub>O<sub>4</sub>: 460.2111; Found: 460.2103.

## Short-step total synthesis of (±)-psychotriasine (9) (Scheme 2)

### Methyl 8-allyl-3a-(5-bromo-3-(2-((methoxycarbonyl)amino)ethyl)-1*H*-indol-1-yl)-3,3a,8,8a-tetrahydro-pyrrolo[2,3-*b*]indole-1(2*H*)-carboxylate (11r)

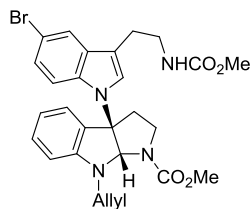

Under argon atmosphere, to a solution of **10b** (0.16 g, 0.64 mmol, 1.0 equiv) and DMSO (45  $\mu$ L, 0.64 mmol, 1.0 equiv) in DCM (3.2 mL, 0.20 M) was added  $\text{TiF}_2\text{O}$  (0.11 mL, 0.64 mmol, 1.0 equiv). After being stirred for 10 min at  $-78^\circ\text{C}$ , DTBP (0.29 mL, 1.3 mmol, 2.0 equiv) was added and the reaction mixture was stirred for 10 min additionally at same temperature. Subsequently, **12b** (0.19 g, 0.64 mmol, 1.0 equiv) was added to the above reaction mixture, and the mixture was stirred for 10 min at  $0^\circ\text{C}$ . DDQ was added to the solutions and stirred 15 min under same temperature. The reaction mixture was filtrated through Celite pad, and the filtrate was washed with 10% aqueous  $\text{NaHCO}_3$ . The organic layer were washed with brine, dried over  $\text{MgSO}_4$ , and concentrated under reduced pressure. The residue was purified by column chromatography with *n*-hexane/ $\text{AcOEt}$  (2:1 to 1:1) as an eluent to give **11r** (0.26 g, 74%) as a white amorphous.

IR ( $\text{CHCl}_3$ ): 1705, 1520, 1452, 1389  $\text{cm}^{-1}$ .

$^1\text{H}$  NMR (500 MHz,  $\text{DMSO-}d_6$ ,  $80^\circ\text{C}$ ):  $\delta$  2.54-2.60 (1H, m), 2.79 (2H, dd,  $J = 7.0, 7.0$  Hz), 3.11-3.22 (2H, m), 3.25 (2H, dd,  $J = 14.0, 7.0$  Hz), 3.53 (3H, s), 3.63 (3H, s), 3.93-4.08 (2H, m), 4.13 (1H, dd,  $J = 16.6, 5.0$  Hz), 5.11 (1H, dd,  $J = 10.5, 1.5$  Hz), 5.20 (1H, dd,  $J = 15.0, 1.5$  Hz), 5.80-5.94 (1H, m), 5.86 (1H, s), 6.59-6.67 (2H, m), 6.87 (1H, br s), 6.88 (1H, d,  $J = 8.9$  Hz), 6.97 (1H, dd,  $J = 7.8, 1.0$  Hz), 7.09 (1H, dd,  $J = 8.9, 1.8$  Hz), 7.18 (1H, ddd,  $J = 7.8, 7.8, 1.0$  Hz), 7.40 (1H, s), 7.70 (1H, d,  $J = 1.8$  Hz).

$^{13}\text{C}$  NMR (125 MHz,  $\text{DMSO-}d_6$ ,  $80^\circ\text{C}$ ):  $\delta$  24.7, 37.0, 40.6, 44.6, 47.5, 50.7, 52.0, 74.2, 84.1, 107.0, 111.67, 111.70, 113.1, 116.2, 117.6, 121.0, 123.1, 123.4, 125.4, 127.2, 129.8, 131.2, 133.5, 133.6, 148.7, 154.4, 156.3.

MS (EI):  $m/z$  (%) 554 ( $\text{M}^+ + 2$ , 7), 552 ( $\text{M}^+$ , 7), 258 (16), 257 (100), 256 (14), 216 (23).

HRMS (EI):  $m/z$  Calcd for  $\text{C}_{27}\text{H}_{29}\text{N}_4\text{O}_4\text{Br}$ : 552.1372; Found: 552.1371.

**Methyl 3a-(5-bromo-3-(2-((methoxycarbonyl)amino)ethyl)-1H-indol-1-yl)-3,3a,8,8a-tetrahydropyrrolo-[2,3-b]indole-1(2H)-carboxylate (11s)**

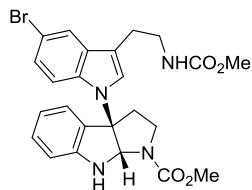

A solution of **11r** (0.26 g, 0.47 mmol) and  $\text{RhCl}_3 \cdot 3\text{H}_2\text{O}$  (40 mg, 0.15 mmol) in EtOH (5.0 mL) and  $\text{H}_2\text{O}$  (3.8 mL) was stirred at 90 °C. After stirring for 2 hours, the reaction mixture was filtrated through Celite pad, and the filtrate was diluted with water and extracted three times with AcOEt. The organic layer were washed with brine, dried over  $\text{MgSO}_4$ , and concentrated under reduced pressure. The residue was purified by column chromatography with *n*-hexane/AcOEt (2:1 to 1:2) as an eluent to give **11s** (0.20 g, 87%) as a white amorphous.

IR ( $\text{CHCl}_3$ ): 1715, 1697, 1454  $\text{cm}^{-1}$ .

$^1\text{H}$  NMR (500 MHz,  $\text{DMSO}-d_6$ , 80 °C):  $\delta$  2.66-2.75 (1H, m), 2.78 (2H, t,  $J = 7.2$  Hz), 3.08-3.18 (2H, m), 3.24 (2H, dt,  $J = 7.2, 7.2$  Hz), 3.53 (3H, s), 3.66 (3H, s), 3.83-3.91 (1H, m), 5.73 (1H, s), 6.63 (1H, ddd,  $J = 7.6, 7.6, 1.2$  Hz), 6.68-6.74 (1H, m), 6.81 (1H, d,  $J = 1.5$  Hz), 6.88 (1H, br s), 7.04 (1H, ddd,  $J = 7.6, 1.2, 1.2$  Hz), 7.08-7.15 (2H, m), 7.22 (1H, d,  $J = 7.6$  Hz), 7.36 (1H, s), 7.68 (1H, d,  $J = 1.8$  Hz).

$^{13}\text{C}$  NMR (125 MHz,  $\text{DMSO}-d_6$ , 80 °C):  $\delta$  24.7, 36.1, 40.6, 44.4, 50.7, 51.8, 75.1, 79.1, 109.4, 111.53, 111.55, 113.2, 117.9, 120.8, 123.3, 123.4, 125.5, 126.7, 129.7, 131.0, 133.6, 149.4, 153.9, 156.2.

MS (EI):  $m/z$  (%) 514 ( $\text{M}^{+2}$ , 8), 512 ( $\text{M}^+$ , 7), 218 (13), 217 (100), 216 (29), 157 (11), 130 (12).

HRMS (EI):  $m/z$  Calcd for  $\text{C}_{24}\text{H}_{25}\text{N}_4\text{O}_4\text{Br}$ : 512.1059; Found: 512.1057.

**(±)-Psychotriasine (9)**

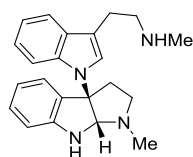

To a solution of  $\text{LiAlH}_4$  (1.0 M in THF) was added **11s** at 0 °C and the reaction mixture was heated at reflux. After 3 hours, the reaction mixture was cooled back to room temperature and carefully quenched by dropwise addition of saturated aqueous Rochelle's salt. The solution was extracted three times with DCM, washed with brine, dried over  $\text{MgSO}_4$ , and concentrated under reduced pressure. The residue was purified by column chromatography with AcOEt/MeOH (10:1 to 5:1) as an eluent to give **9** (53 mg, 98%) as a colorless amorphous.

IR ( $\text{CHCl}_3$ ): 3428, 1485, 1458  $\text{cm}^{-1}$ .

$^1\text{H}$  NMR (500 MHz,  $\text{CD}_3\text{OD}$ ):  $\delta$  2.42 (3H, s), 2.47 (3H, s), 2.47-2.51 (1H, m), 2.57-2.66 (1H, m), 2.82-3.04 (5H, m), 3.15-3.25 (1H, m), 5.22 (1H, s), 6.58 (1H, ddd,  $J = 7.7, 7.7, 1.2$  Hz), 6.69 (1H, d,  $J = 7.7$  Hz), 6.86 (1H, dd,  $J = 7.7, 1.2$  Hz), 6.94 (1H, ddd,  $J = 7.7, 7.7, 1.2$  Hz), 6.97 (1H, ddd,  $J = 7.7, 7.7, 1.2$  Hz), 7.07 (1H, ddd,  $J = 7.7, 7.7, 1.2$  Hz), 7.14 (1H, dd,  $J = 7.7, 1.2$  Hz), 7.40 (1H, s), 7.52 (1H, dd,  $J = 7.7, 1.2$  Hz).

<sup>13</sup>C NMR (125 MHz, CD<sub>3</sub>OD): δ 25.8, 35.9, 36.4, 40.0, 52.2, 52.9, 77.5, 87.1, 110.1, 113.0, 113.1, 119.5, 119.7, 120.2, 122.5, 124.8, 125.1, 130.6, 130.9, 131.5, 137.8, 152.5.

HRMS (FAB): *m/z* Calcd for C<sub>22</sub>H<sub>27</sub>N<sub>4</sub> [M+H]<sup>+</sup>: 347.2236; Found: 347.2239.

### III. References

- 1) Y. Yang, X. Jiang, F.-L. Qing, *J. Org. Chem.*, 2012, **77**, 7538.
- 2) M. Somei, N. Oshikiri, M. Hasegawa, F. Yamada, *Heterocycles*, 1999, **51**, 1237
- 3) M. Hasegawa, K. Yamada, Y. Nagahama, M. Somei, *Heterocycles*, 1999, **51**, 2815
- 4) M. Somei, *JP Pat.*, 08 157 475, 1994.

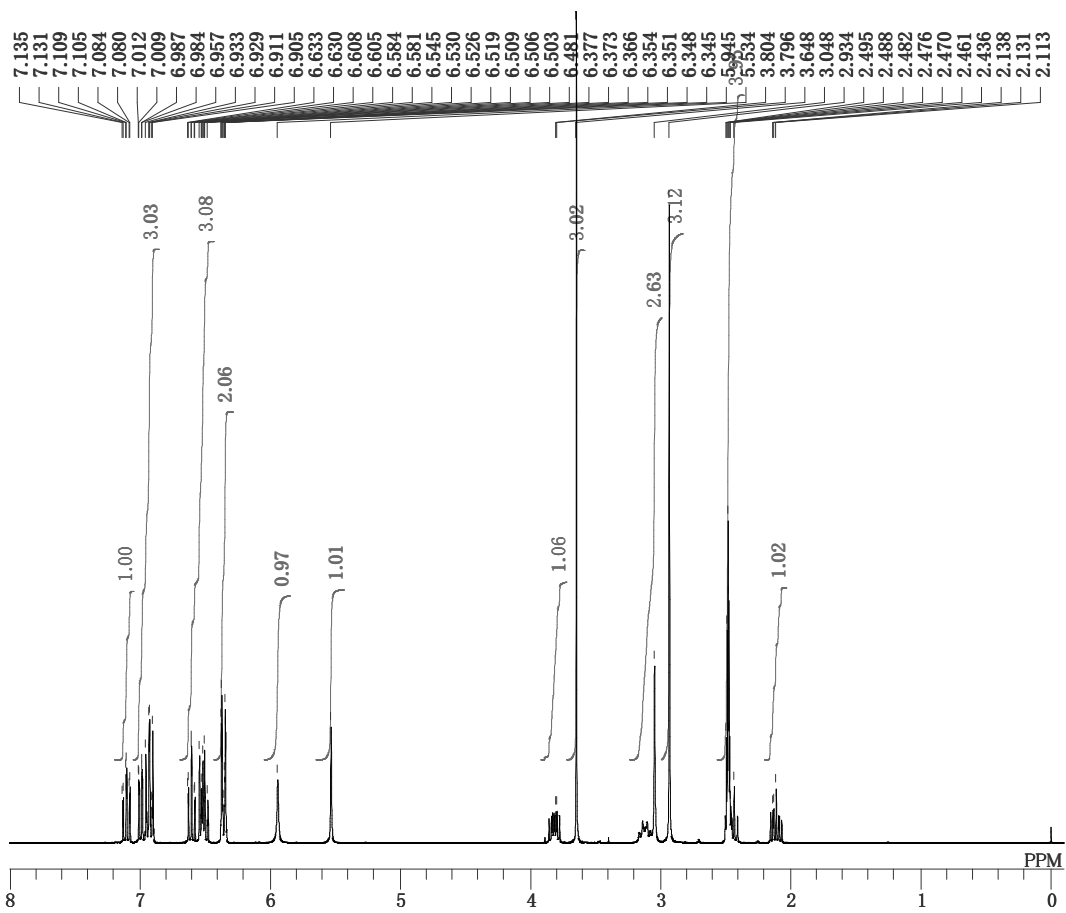

DFILE 11a H.als  
COMINT 11a H  
DATIM Mon Jan 19 13:49:03 2015  
OBNUC 1H  
EXMOD NON  
OBFRQ 300.40 MHz  
OBSET 130.00 KHz  
OBFIN 1150.00 Hz  
POINT 32768  
FREQU 6006.01 Hz  
SCANS 16  
ACQTM 5.4559 sec  
PD 1.5440 sec  
PW1 5.30 usec  
IRNUC 1H  
CTEMP 80.5 c  
SLVNT DMSO  
EXREF 0.00 ppm  
BF 0.12 Hz  
RGAIN 17

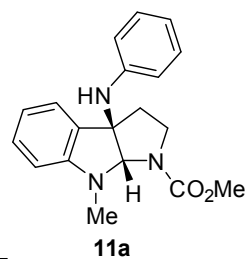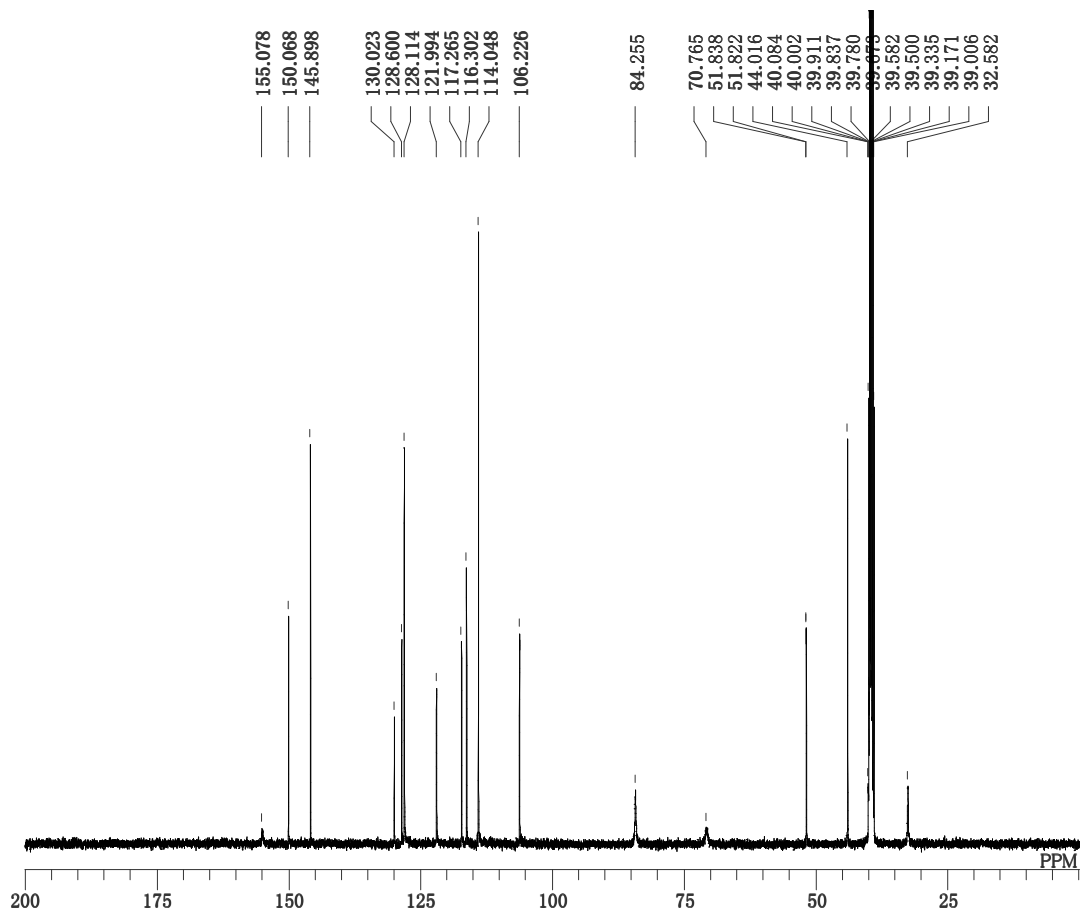

DFILE 11a C.als  
COMINT 11a C  
DATIM Sun Jan 11 16:19:14 2015  
OBNUC 13C  
EXMOD bcm  
OBFRQ 125.65 MHz  
OBSET 120.00 KHz  
OBFIN 7958.00 Hz  
POINT 32768  
FREQU 33898.30 Hz  
SCANS 13000  
ACQTM 0.9667 sec  
PD 2.0333 sec  
PW1 4.40 usec  
IRNUC 1H  
CTEMP 80.1 c  
SLVNT DMSO  
EXREF 39.50 ppm  
BF 1.20 Hz  
RGAIN 27

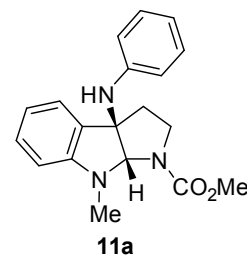

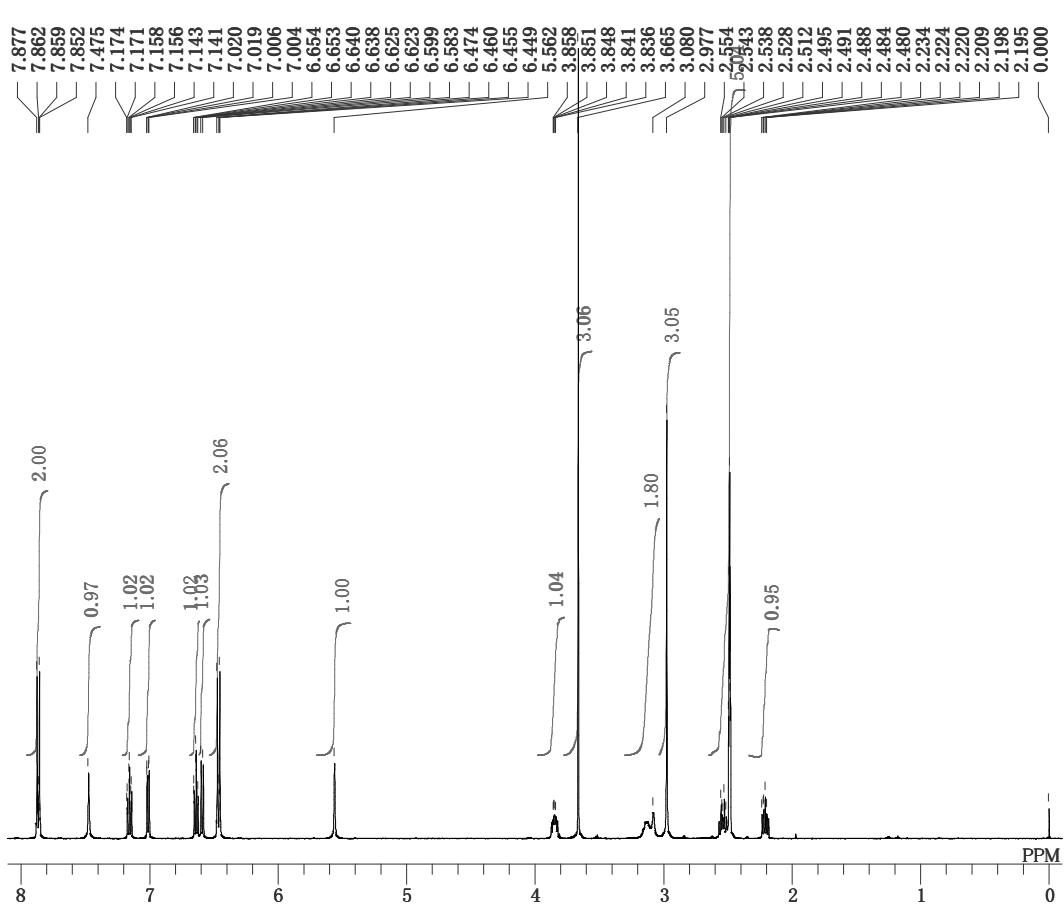

DFILE 11b H.als  
 COMNT 11b H  
 DATIM Tue Dec 30 06:41:46 2014  
 1H  
 OBNUC non  
 EXMOD non  
 OBFRQ 500.00 MHz  
 OBSET 160.00 KHz  
 OBFIN 2160.00 Hz  
 POINT 32768  
 FREQU 10000.00 Hz  
 SCANS 32  
 ACQTM 3.2768 sec  
 PD 3.7232 sec  
 PW1 5.00 usec  
 IRNUC 1H  
 CTEMP 80.0 c  
 SLVNT DMSO  
 EXREF 0.00 ppm  
 BF 0.12 Hz  
 RGAIN 25

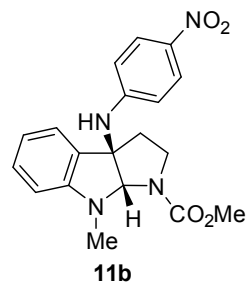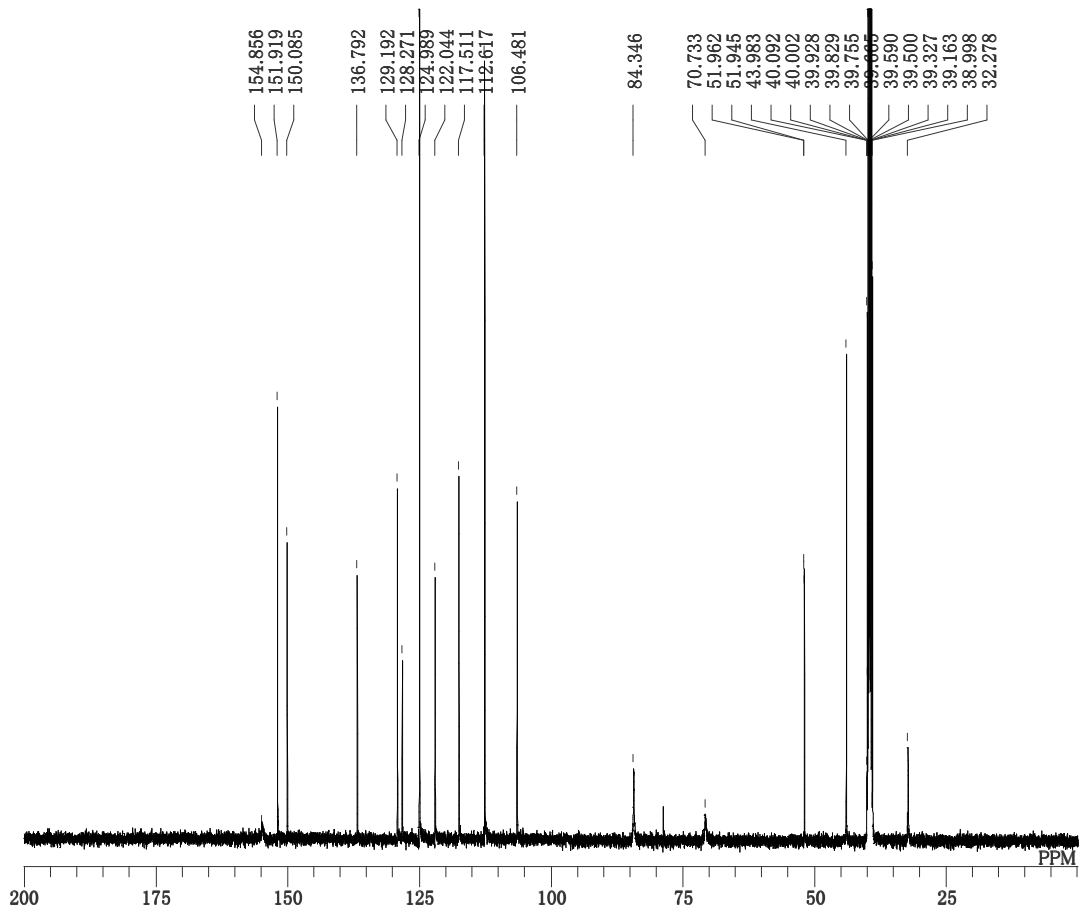

DFILE 11b C.als  
 COMNT 11b C  
 DATIM Tue Dec 30 13:23:08 2014  
 13C  
 OBNUC bcm  
 EXMOD bcm  
 OBFRQ 125.65 MHz  
 OBSET 120.00 KHz  
 OBFIN 7958.00 Hz  
 POINT 32768  
 FREQU 33898.30 Hz  
 SCANS 8000  
 ACQTM 0.9667 sec  
 PD 2.0333 sec  
 PW1 4.40 usec  
 IRNUC 1H  
 CTEMP 80.0 c  
 SLVNT DMSO  
 EXREF 39.50 ppm  
 BF 0.12 Hz  
 RGAIN 28

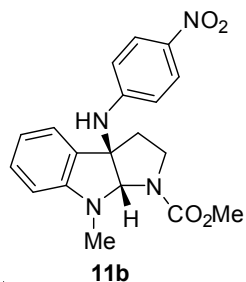

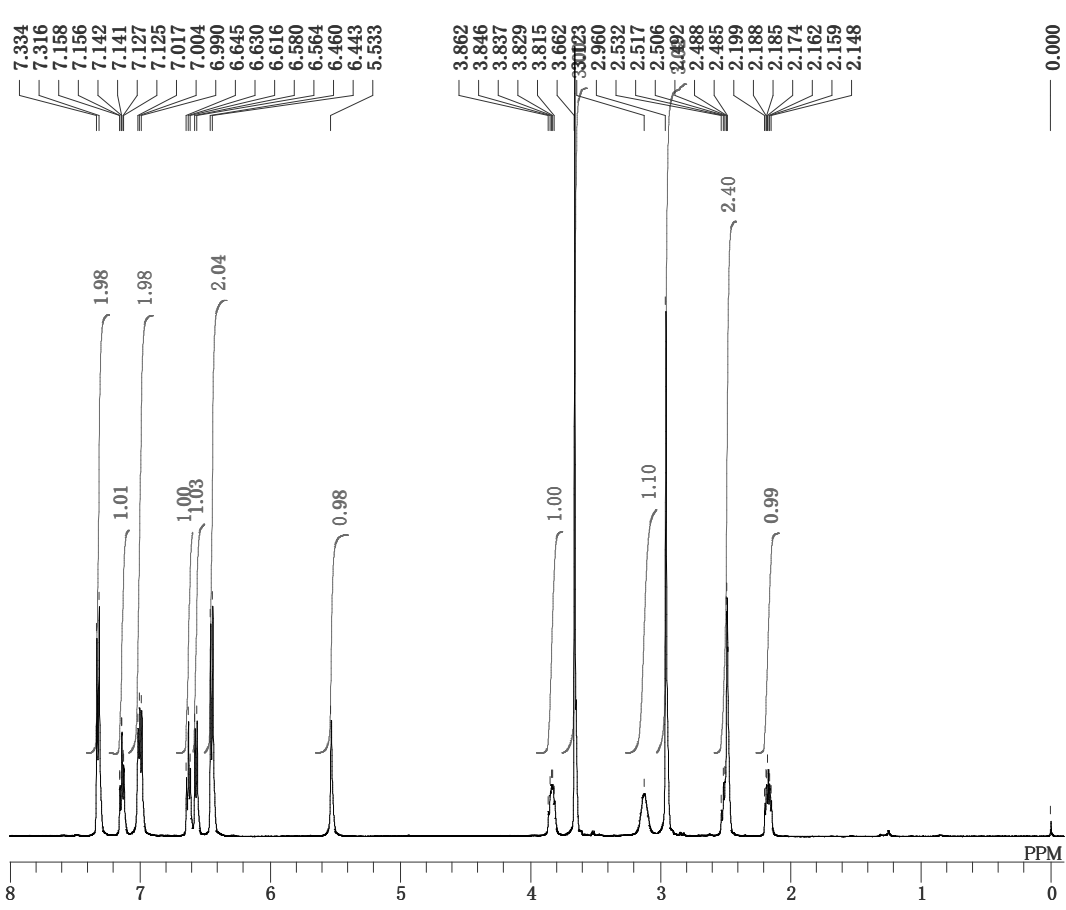

DFILE 11c H.als  
 COMINT 11c H  
 DATIM Wed Dec 31 03:44:10 2014  
 1H  
 EXMOD non  
 OBFRQ 500.00 MHz  
 OBSET 160.00 KHz  
 OBFIN 2160.00 Hz  
 POINT 32768  
 FREQU 10000.00 Hz  
 SCANS 16  
 ACQTM 3.2768 sec  
 PD 3.7232 sec  
 PW1 5.00 usec  
 IRNUC 1H  
 CTEMP 80.0 c  
 SLVNT DMSO  
 EXREF 0.00 ppm  
 BF 0.09 Hz  
 RGAIN 19

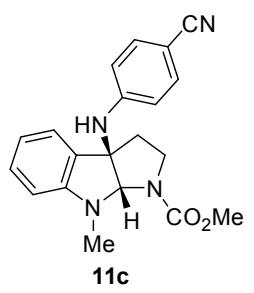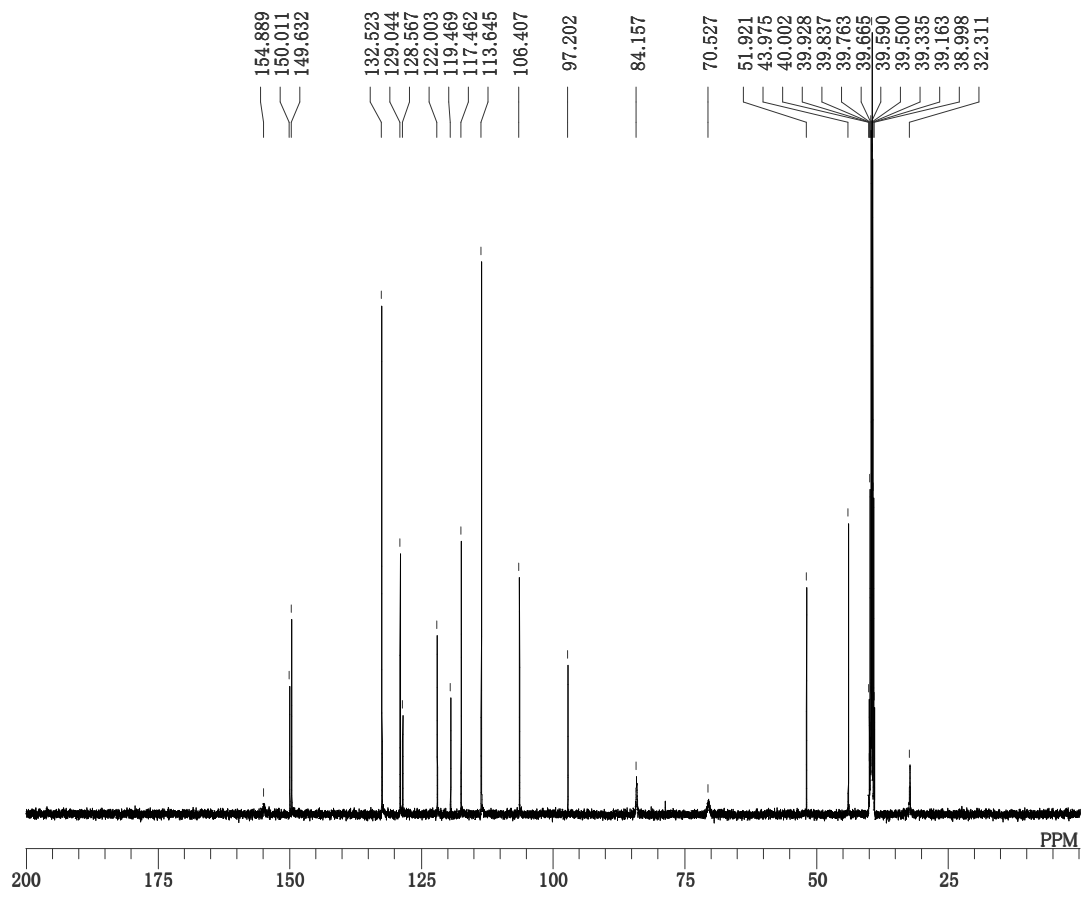

DFILE 11c C.als  
 COMINT 11c C  
 DATIM Wed Dec 31 04:36:38 2014  
 13C  
 EXMOD bcm  
 OBFRQ 125.65 MHz  
 OBSET 120.00 KHz  
 OBFIN 7958.00 Hz  
 POINT 32768  
 FREQU 33898.30 Hz  
 SCANS 1024  
 ACQTM 0.9667 sec  
 PD 2.0333 sec  
 PW1 4.40 usec  
 IRNUC 1H  
 CTEMP 80.0 c  
 SLVNT DMSO  
 EXREF 39.50 ppm  
 BF 0.09 Hz  
 RGAIN 28

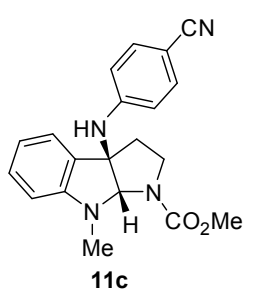



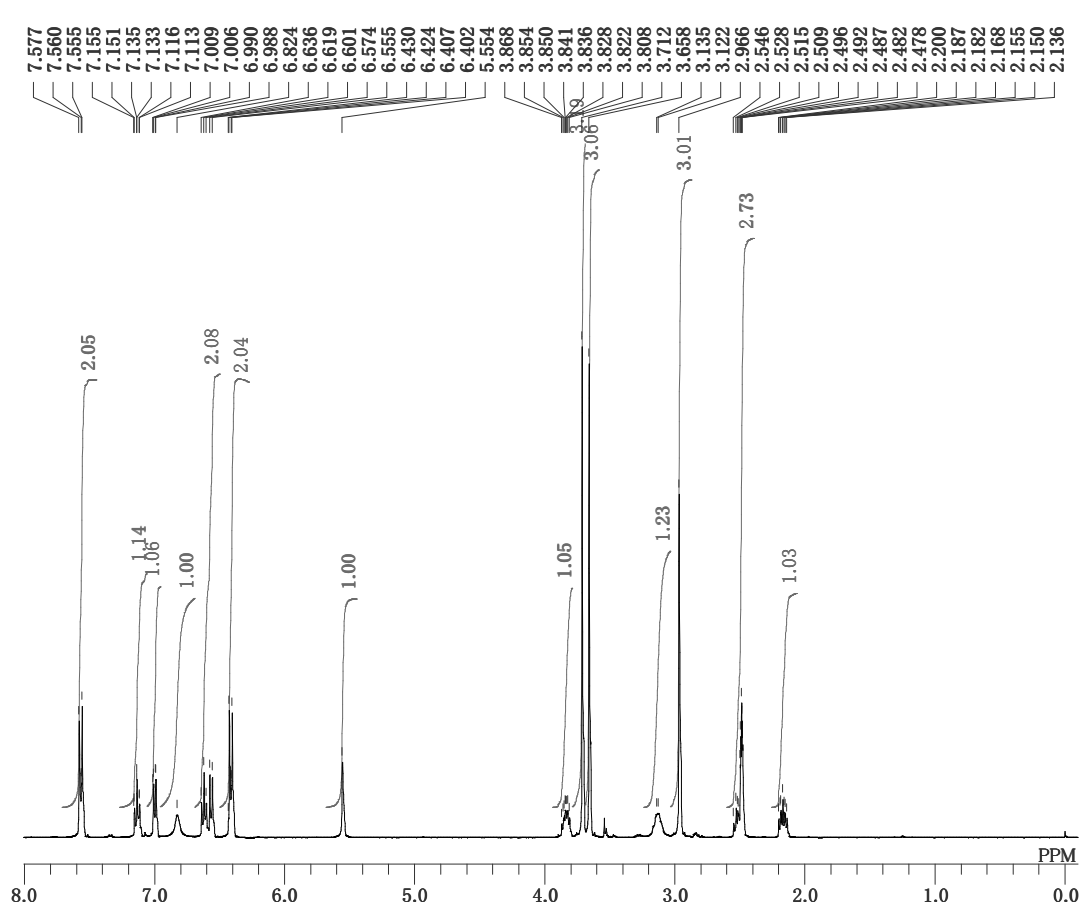

DFILE 11d H.als  
COMNT 11d H  
DATIM Sat Jan 10 15:27:05 2015  
1H  
OBNUC 1H  
EXMOD NON  
OBFRQ 399.65 MHz  
OBSET 124.00 KHz  
OBFIN 10500.00 Hz  
POINT 16384  
FREQU 7992.01 Hz  
SCANS 16  
ACQTM 2.0500 sec  
PD 4.9500 sec  
PW1 5.80 usec  
IRNUC 1H  
CTEMP 80.2 c  
SLVNT DMSO  
EXREF 0.00 ppm  
BF 0.12 Hz  
RGAIN 15

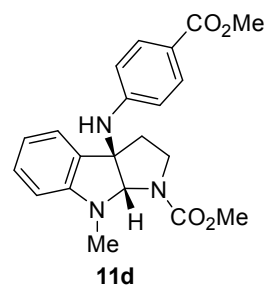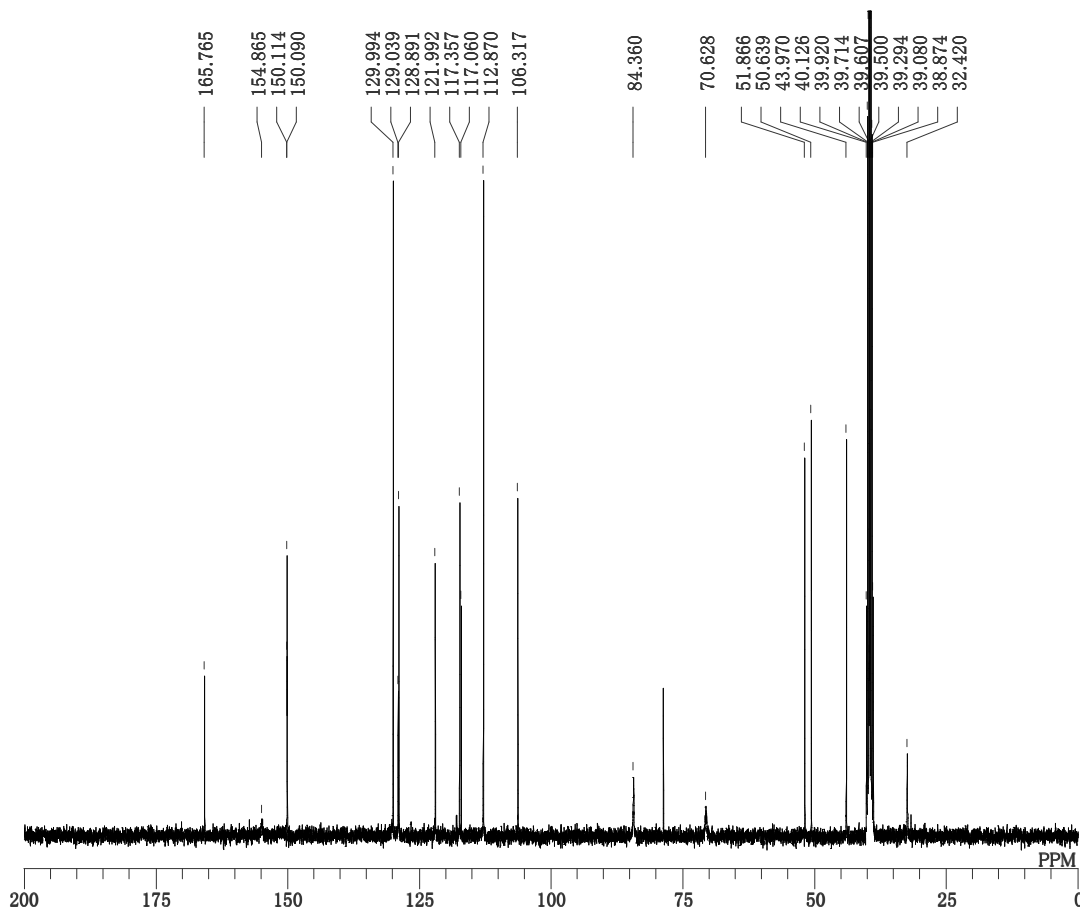

DFILE 11d C.als  
COMNT 11d C  
DATIM Sat Jan 10 16:45:37 2015  
13C  
OBNUC 13C  
EXMOD BCM  
OBFRQ 100.40 MHz  
OBSET 125.00 KHz  
OBFIN 10500.00 Hz  
POINT 32768  
FREQU 27118.64 Hz  
SCANS 1500  
ACQTM 1.2083 sec  
PD 1.7920 sec  
PW1 6.00 usec  
IRNUC 1H  
CTEMP 80.2 c  
SLVNT DMSO  
EXREF 39.50 ppm  
BF 1.20 Hz  
RGAIN 24

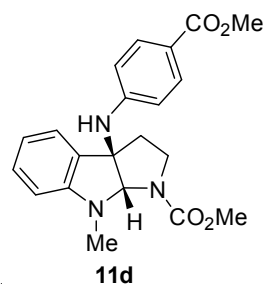

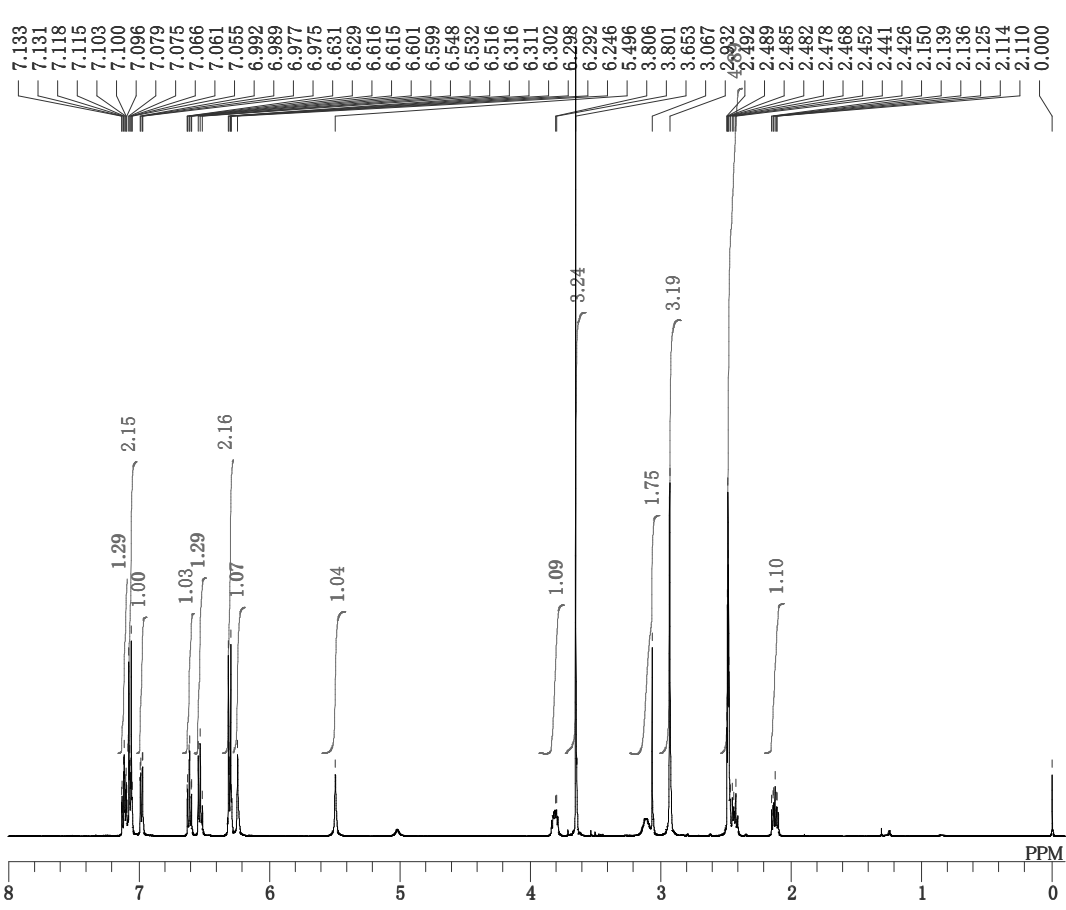

DFILE 11e H.als  
 COMINT 11e H  
 DATIM Mon Oct 20 23:03:57 2014  
 OBNUC 1H  
 EXMOD non  
 OBFRQ 500.00 MHz  
 OBSET 160.00 KHz  
 OBFIN 2160.00 Hz  
 POINT 32768  
 FREQU 10000.00 Hz  
 SCANS 16  
 ACQTM 3.2768 sec  
 PD 3.7232 sec  
 PW1 5.00 usec  
 IRNUC 1H  
 CTEMP 80.0 c  
 SLVNT DMSO  
 EXREF 0.00 ppm  
 BF 0.09 Hz  
 RGAIN 20

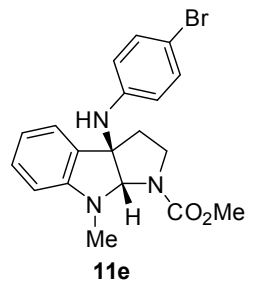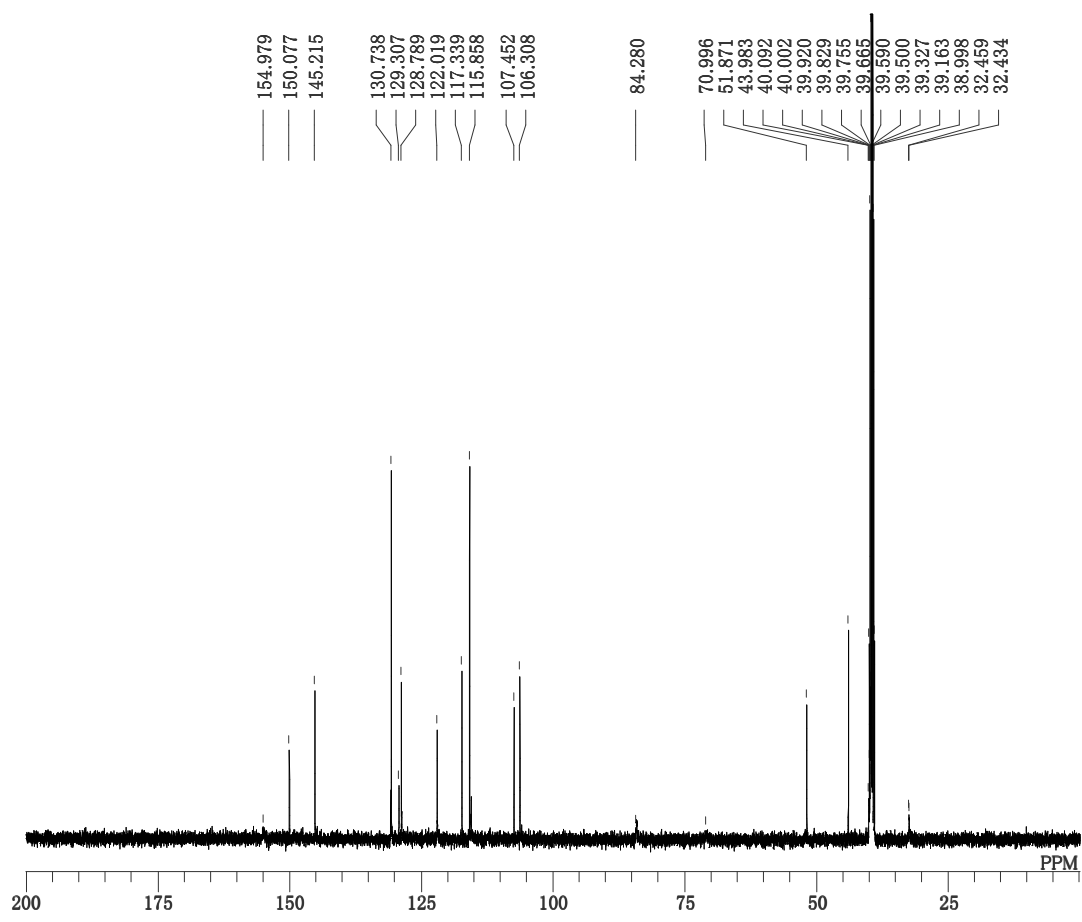

DFILE 11e C.als  
 COMINT 11e C  
 DATIM Tue Dec 30 05:49:27 2014  
 OBNUC 13C  
 EXMOD bcm  
 OBFRQ 125.65 MHz  
 OBSET 120.00 KHz  
 OBFIN 7958.00 Hz  
 POINT 32768  
 FREQU 33898.30 Hz  
 SCANS 1024  
 ACQTM 0.9667 sec  
 PD 2.0333 sec  
 PW1 4.40 usec  
 IRNUC 1H  
 CTEMP 79.9 c  
 SLVNT DMSO  
 EXREF 39.50 ppm  
 BF 0.12 Hz  
 RGAIN 27

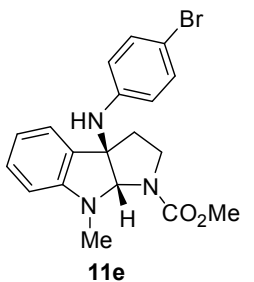

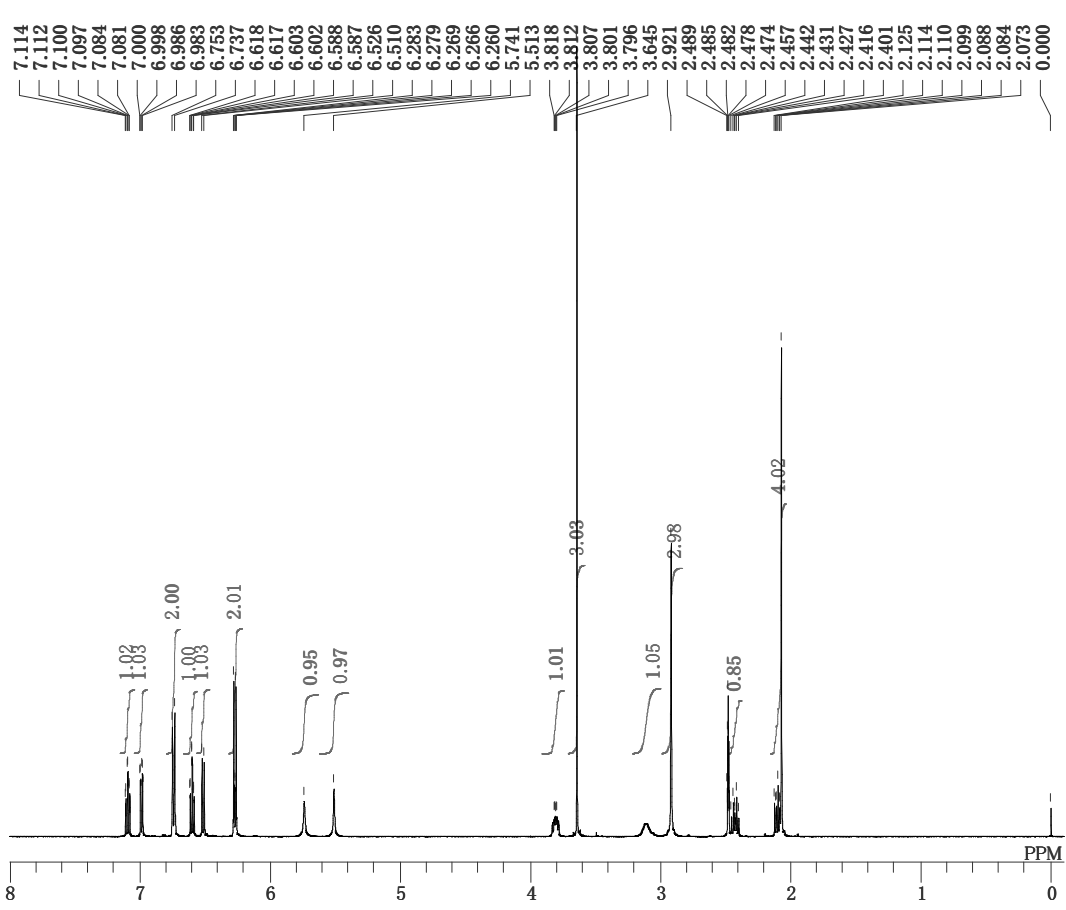

DFILE 11f H.als  
COMNT 11f H  
DATIM Wed Dec 31 05:16:46 2014  
OBNUC 1H  
EXMOD non  
OBFRQ 500.00 MHz  
OBSET 160.00 KHz  
OBFIN 2160.00 Hz  
POINT 32768  
FREQU 10000.00 Hz  
SCANS 8  
ACQTM 3.2768 sec  
PD 3.7232 sec  
PW1 5.00 usec  
IRNUC 1H  
CTEMP 80.0 c  
SLVNT DMSO  
EXREF 0.00 ppm  
BF 0.12 Hz  
RGAIN 22

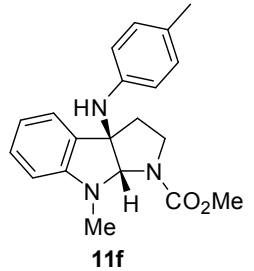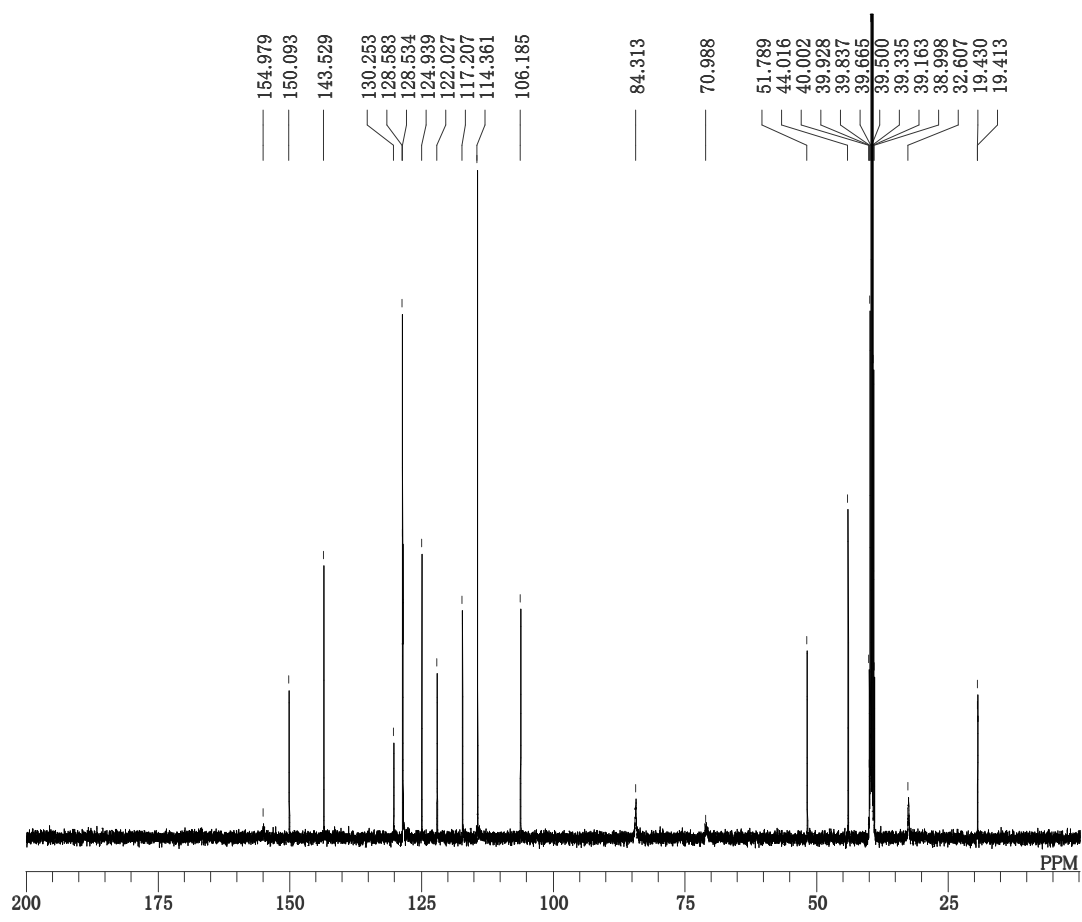

DFILE 11f C.als  
COMNT 11f C  
DATIM Wed Dec 31 05:58:02 2014  
OBNUC 13C  
EXMOD bcm  
OBFRQ 125.65 MHz  
OBSET 120.00 KHz  
OBFIN 7958.00 Hz  
POINT 32768  
FREQU 33898.30 Hz  
SCANS 800  
ACQTM 0.9667 sec  
PD 2.0333 sec  
PW1 4.40 usec  
IRNUC 1H  
CTEMP 80.0 c  
SLVNT DMSO  
EXREF 39.50 ppm  
BF 0.12 Hz  
RGAIN 28

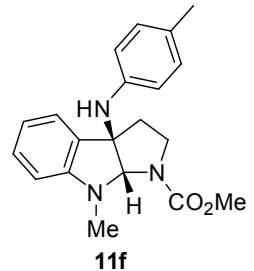

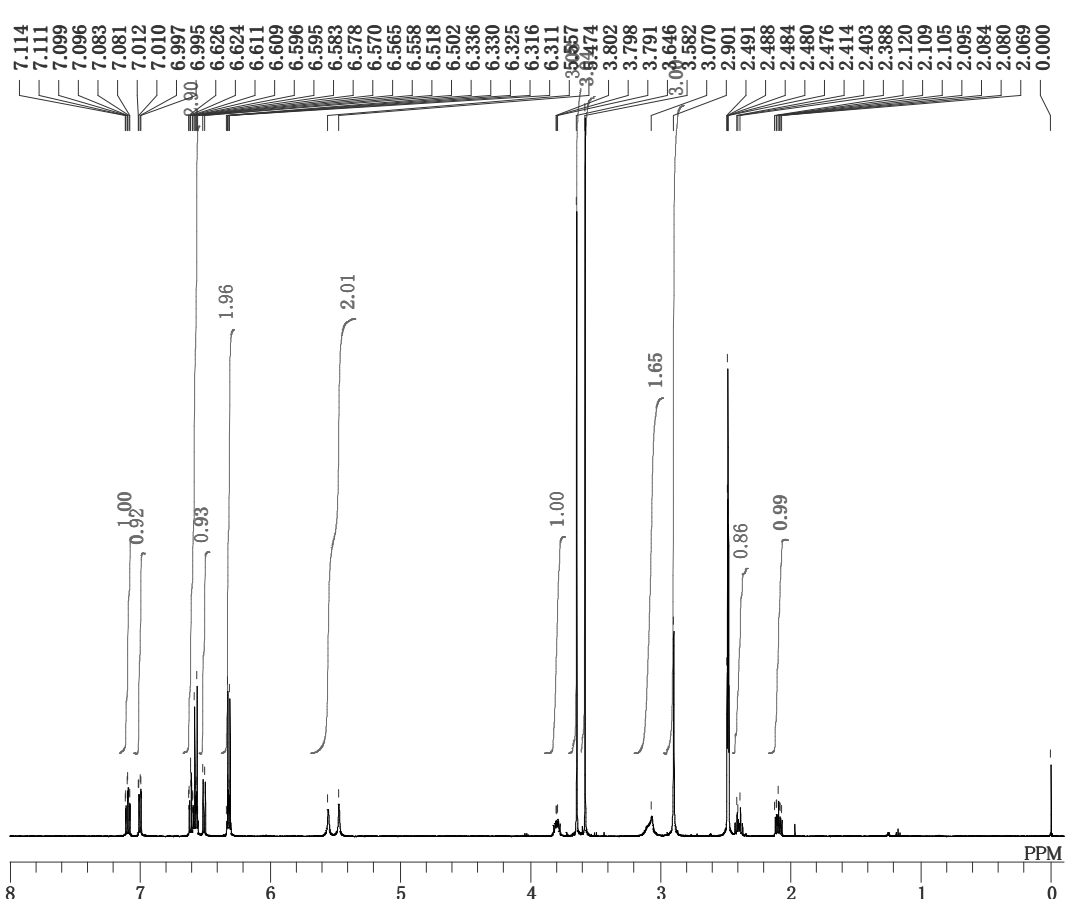

DFILE 11g H.als  
COMNT 11g H  
DATIM Sun Jan 4 18:33:06 2015  
OBNUC 1H  
EXMOD non  
OBFRQ 500.00 MHz  
OBSET 160.00 KHz  
OBFIN 2160.00 Hz  
POINT 32768  
FREQU 10000.00 Hz  
SCANS 8  
ACQTM 3.2768 sec  
PD 3.7232 sec  
PW1 5.00 usec  
IRNUC 1H  
CTEMP 80.0 c  
SLVNT DMSO  
EXREF 0.00 ppm  
BF 0.09 Hz  
RGAIN 23

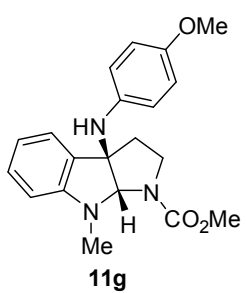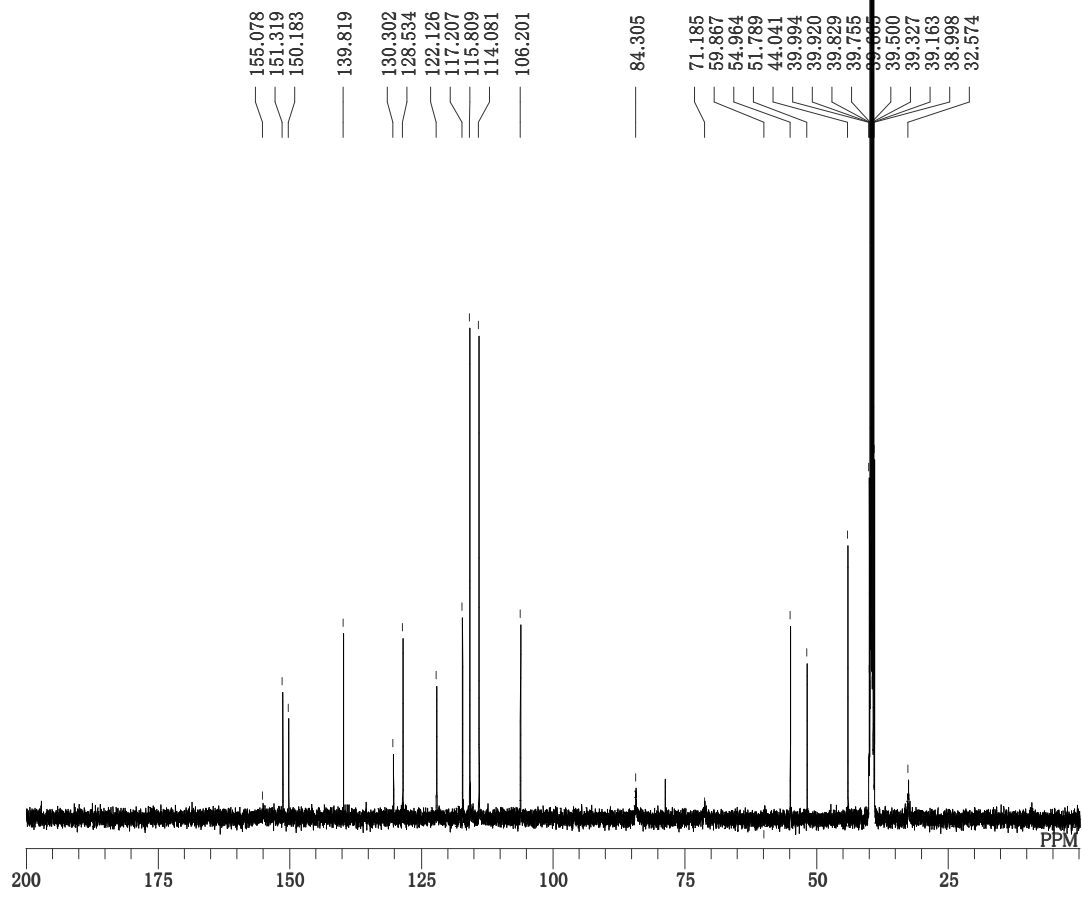

DFILE 11g C.als  
COMNT 11g C  
DATIM Mon Jan 5 04:09:04 2015  
OBNUC 13C  
EXMOD bcm  
OBFRQ 125.65 MHz  
OBSET 120.00 KHz  
OBFIN 7958.00 Hz  
POINT 32768  
FREQU 33898.30 Hz  
SCANS 3000  
ACQTM 0.9667 sec  
PD 2.0333 sec  
PW1 4.40 usec  
IRNUC 1H  
CTEMP 80.0 c  
SLVNT DMSO  
EXREF 39.50 ppm  
BF 2.00 Hz  
RGAIN 27

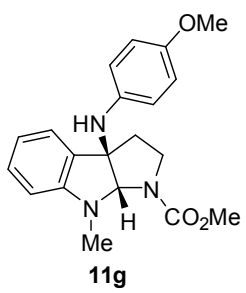

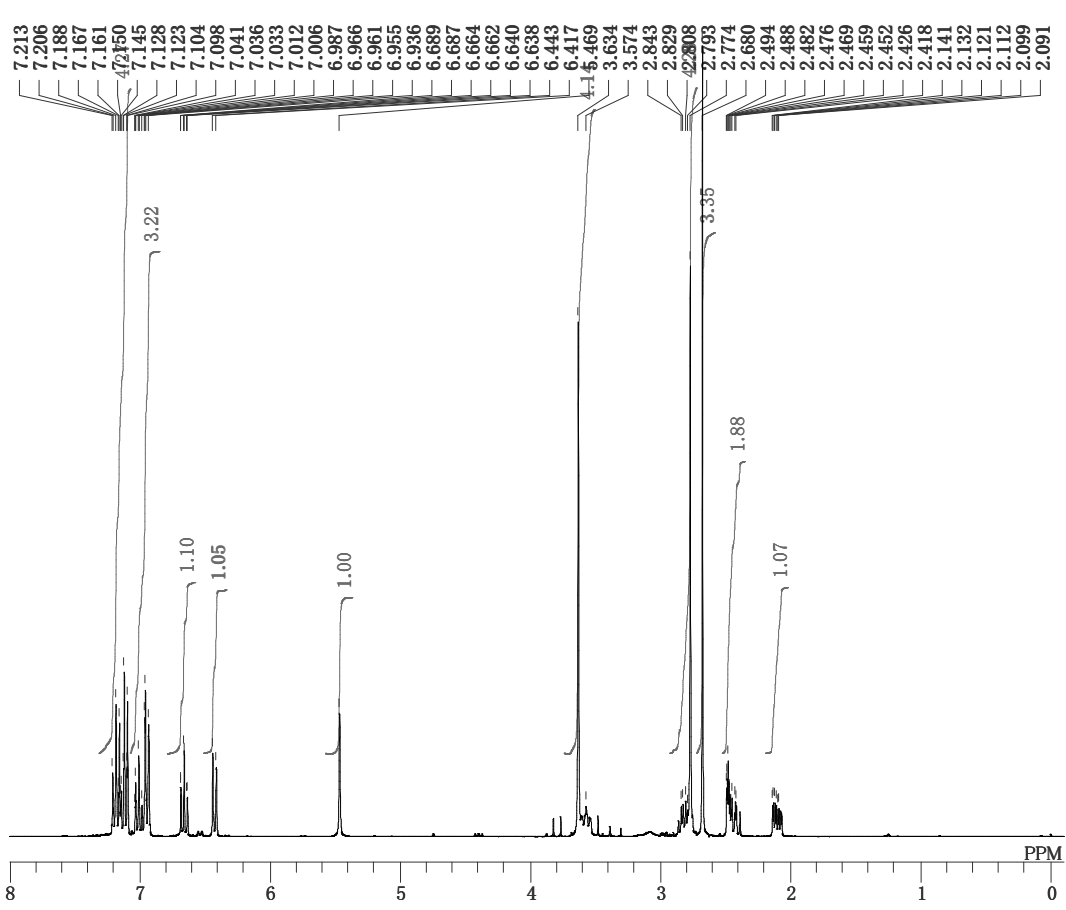

DFILE 11h H.als  
 COMNT 11h H  
 DATIM Mon Jan 19 16:50:28 2015  
 OBNUC 1H  
 EXMOD NON  
 OBFRQ 300.40 MHz  
 OBSET 130.00 KHz  
 OBFIN 1150.00 Hz  
 POINT 32768  
 FREQU 6006.01 Hz  
 SCANS 8  
 ACQTM 5.4559 sec  
 PD 1.5440 sec  
 PW1 5.30 usec  
 IRNUC 1H  
 CTEMP 80.4 c  
 SLVNT DMSO  
 EXREF 0.00 ppm  
 BF 0.12 Hz  
 RGAIN 13

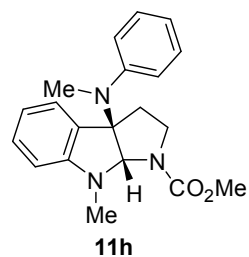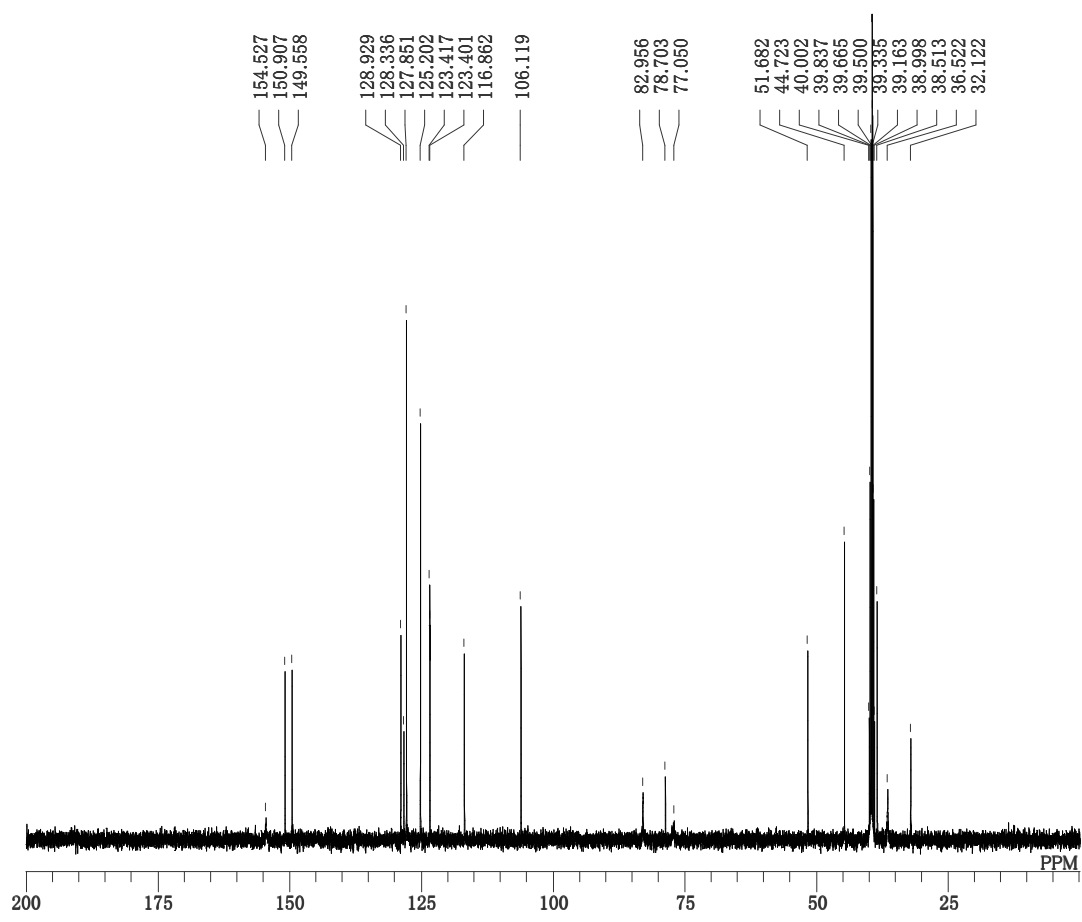

DFILE 11h C.als  
 COMNT 11h C  
 DATIM Wed Jan 16 21:56:11 2013  
 OBNUC 13C  
 EXMOD bcm  
 OBFRQ 125.65 MHz  
 OBSET 120.00 KHz  
 OBFIN 7958.00 Hz  
 POINT 32768  
 FREQU 33898.30 Hz  
 SCANS 128  
 ACQTM 0.9667 sec  
 PD 2.0333 sec  
 PW1 5.40 usec  
 IRNUC 1H  
 CTEMP 80.0 c  
 SLVNT DMSO  
 EXREF 39.50 ppm  
 BF 0.12 Hz  
 RGAIN 28

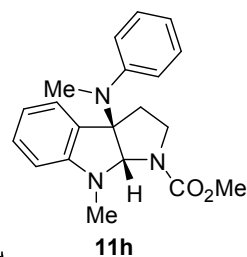

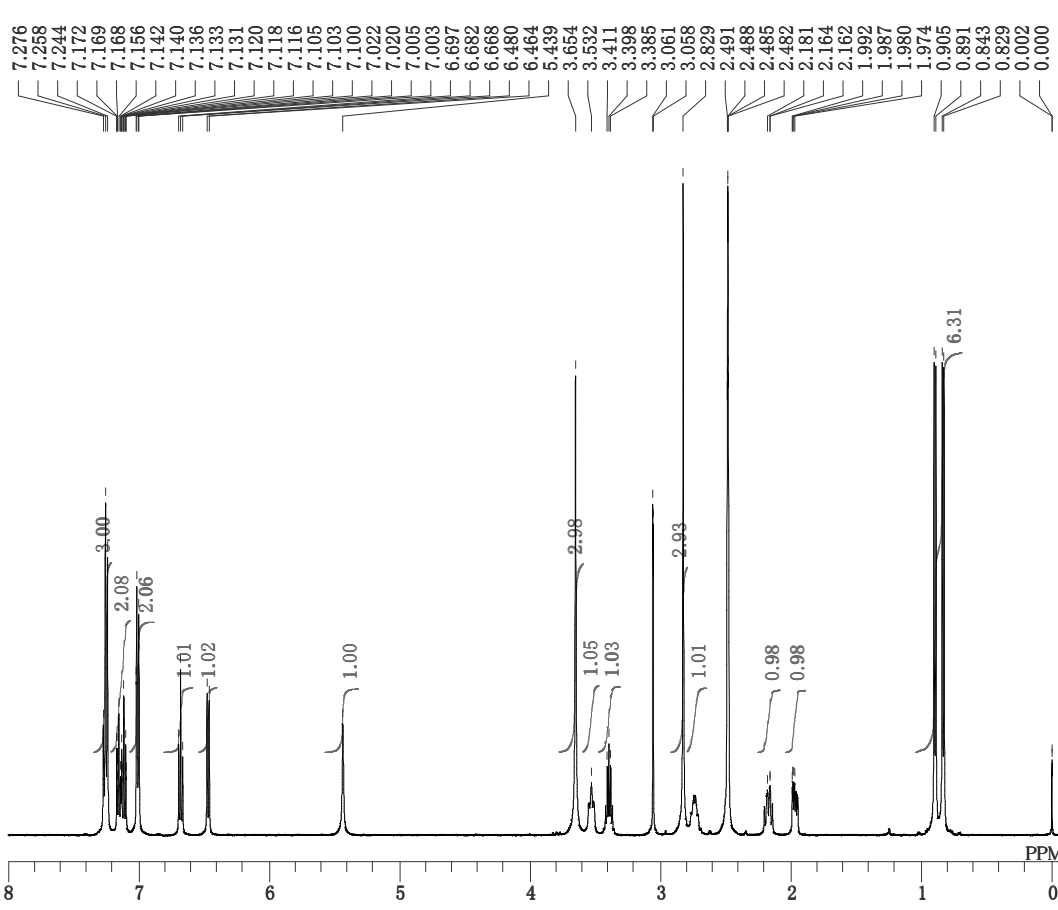

DFILE 11i H.als  
 COMINT 11i H  
 DATIM Sat Nov 15 21:16:15 2014  
 1H  
 OBNUC non  
 EXMOD non  
 OBFRQ 500.00 MHz  
 OBSET 160.00 KHz  
 OBFIN 2160.00 Hz  
 POINT 32768  
 FREQU 10000.00 Hz  
 SCANS 16  
 ACQTM 3.2768 sec  
 PD 3.7232 sec  
 PW1 5.00 usec  
 IRNUC 1H  
 CTEMP 80.0 c  
 SLVNT DMSO  
 EXREF 0.00 ppm  
 BF 0.09 Hz  
 RGAIN 23

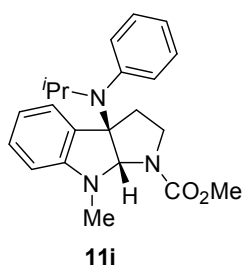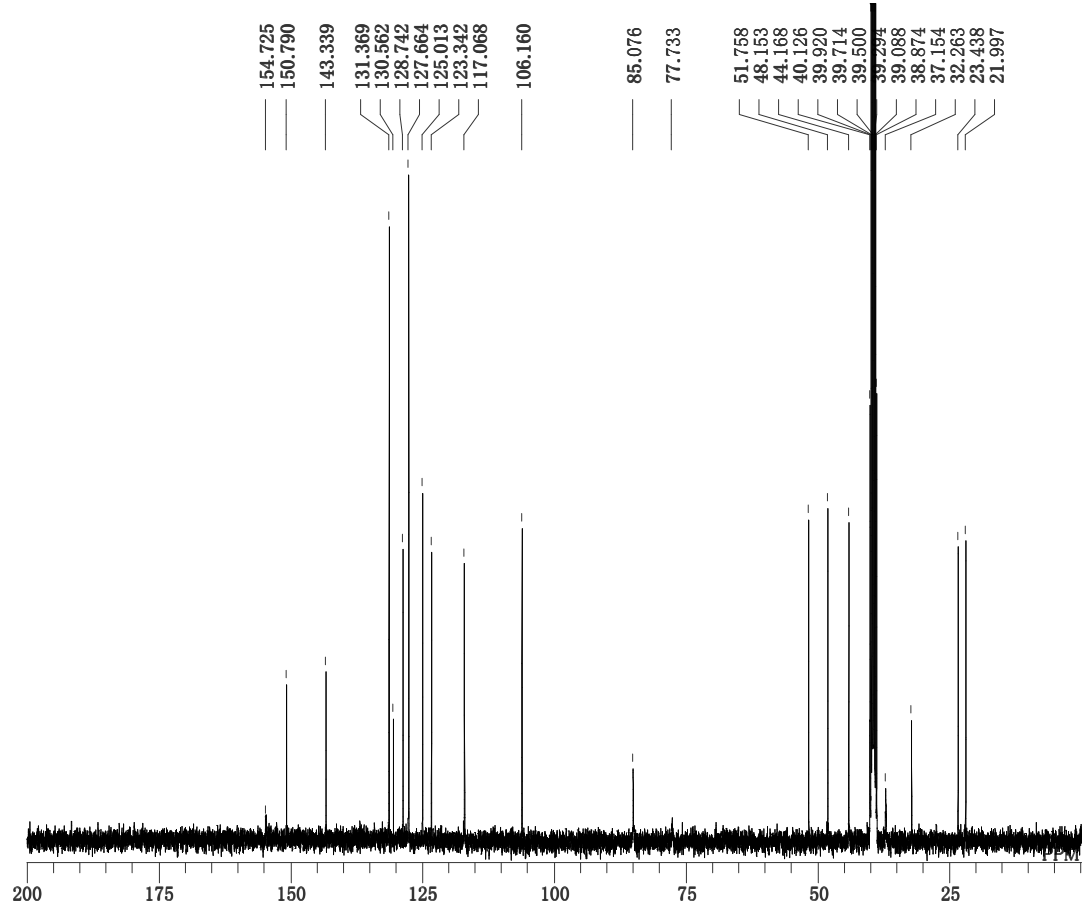

DFILE 11i C.als  
 COMINT 11i C  
 DATIM Thu Jan 29 23:11:29 2015  
 13C  
 OBNUC BCM  
 EXMOD BCM  
 OBFRQ 100.40 MHz  
 OBSET 125.00 KHz  
 OBFIN 10500.00 Hz  
 POINT 32768  
 FREQU 27118.64 Hz  
 SCANS 3000  
 ACQTM 1.2083 sec  
 PD 1.7920 sec  
 PW1 6.00 usec  
 IRNUC 1H  
 CTEMP 80.2 c  
 SLVNT DMSO  
 EXREF 39.50 ppm  
 BF 1.20 Hz  
 RGAIN 24

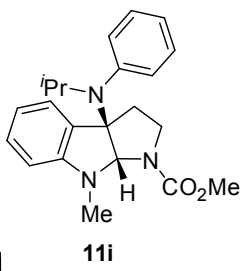

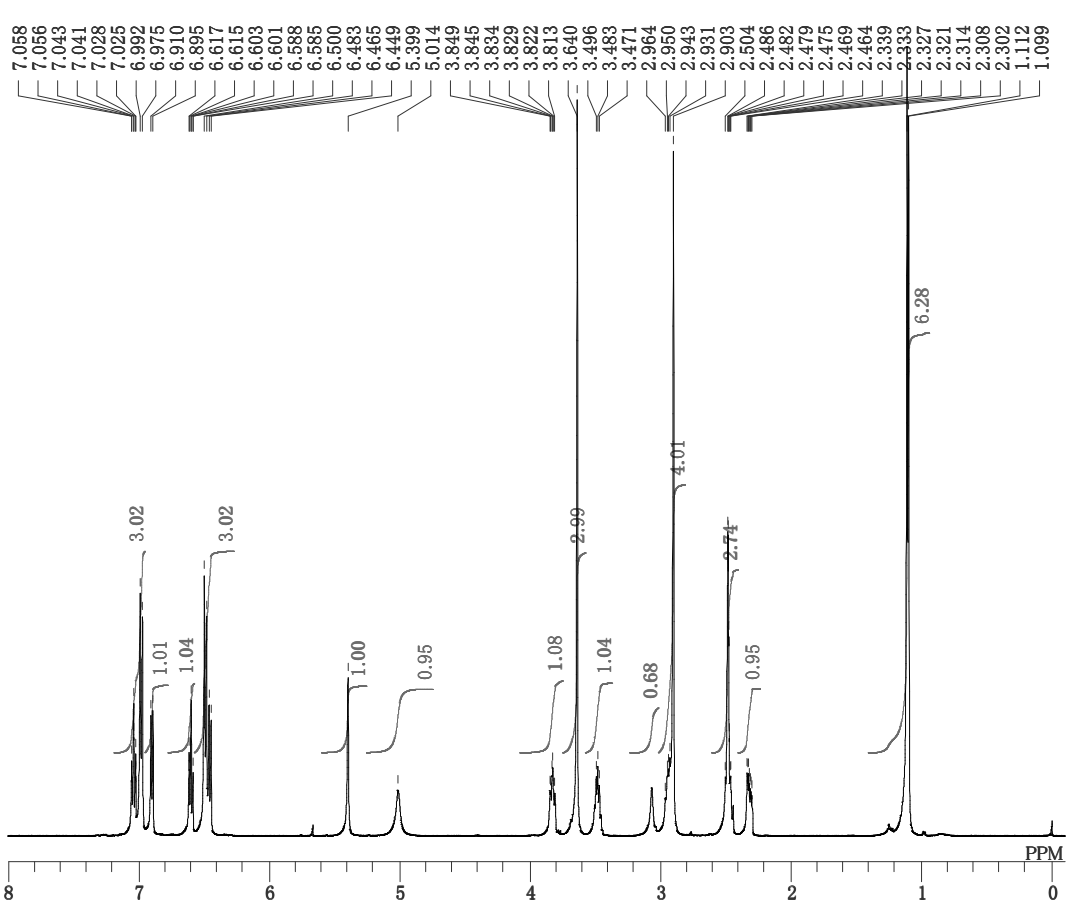

DFILE 11j H.als  
 COMNT 11j H  
 DATIM Sun Nov 16 21:05:42 2014  
 OBNUC 1H  
 EXMOD non  
 OBFRQ 500.00 MHz  
 OBSET 160.00 KHz  
 OBFIN 2160.00 Hz  
 POINT 32768  
 FREQU 10000.00 Hz  
 SCANS 8  
 ACQTM 3.2768 sec  
 PD 3.7232 sec  
 PW1 5.00 usec  
 IRNUC 1H  
 CTEMP 80.0 c  
 SLVNT DMSO  
 EXREF 0.00 ppm  
 BF 0.09 Hz  
 RGAIN 18

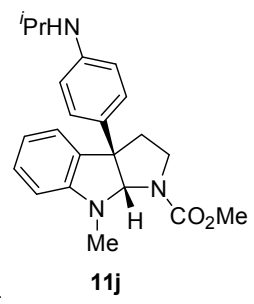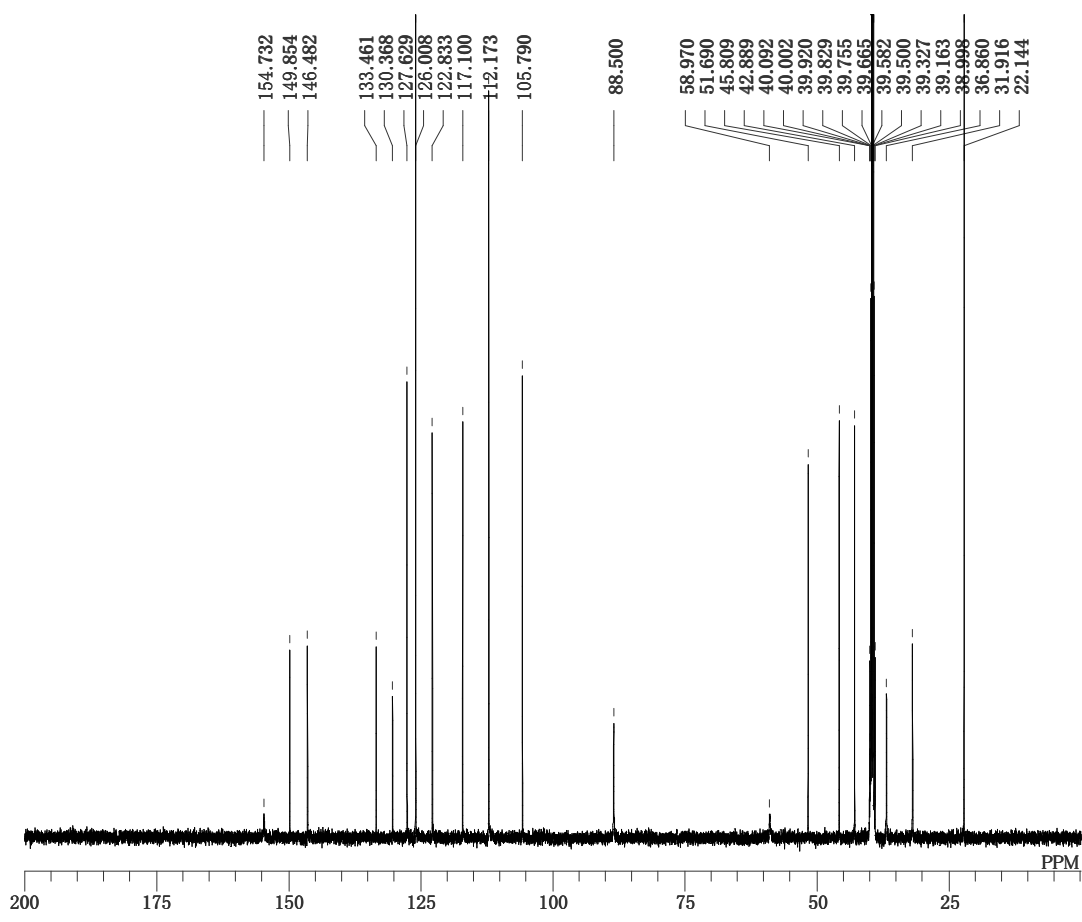

DFILE 11j C.als  
 COMNT 11j C  
 DATIM Sun Nov 16 22:27:00 2014  
 OBNUC 13C  
 EXMOD bcm  
 OBFRQ 125.65 MHz  
 OBSET 120.00 KHz  
 OBFIN 7958.00 Hz  
 POINT 32768  
 FREQU 33898.30 Hz  
 SCANS 1600  
 ACQTM 0.9667 sec  
 PD 2.0333 sec  
 PW1 4.40 usec  
 IRNUC 1H  
 CTEMP 80.0 c  
 SLVNT DMSO  
 EXREF 39.50 ppm  
 BF 0.09 Hz  
 RGAIN 28

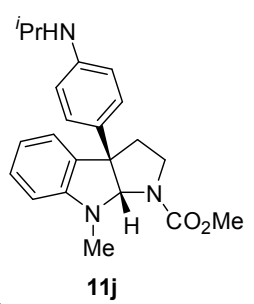

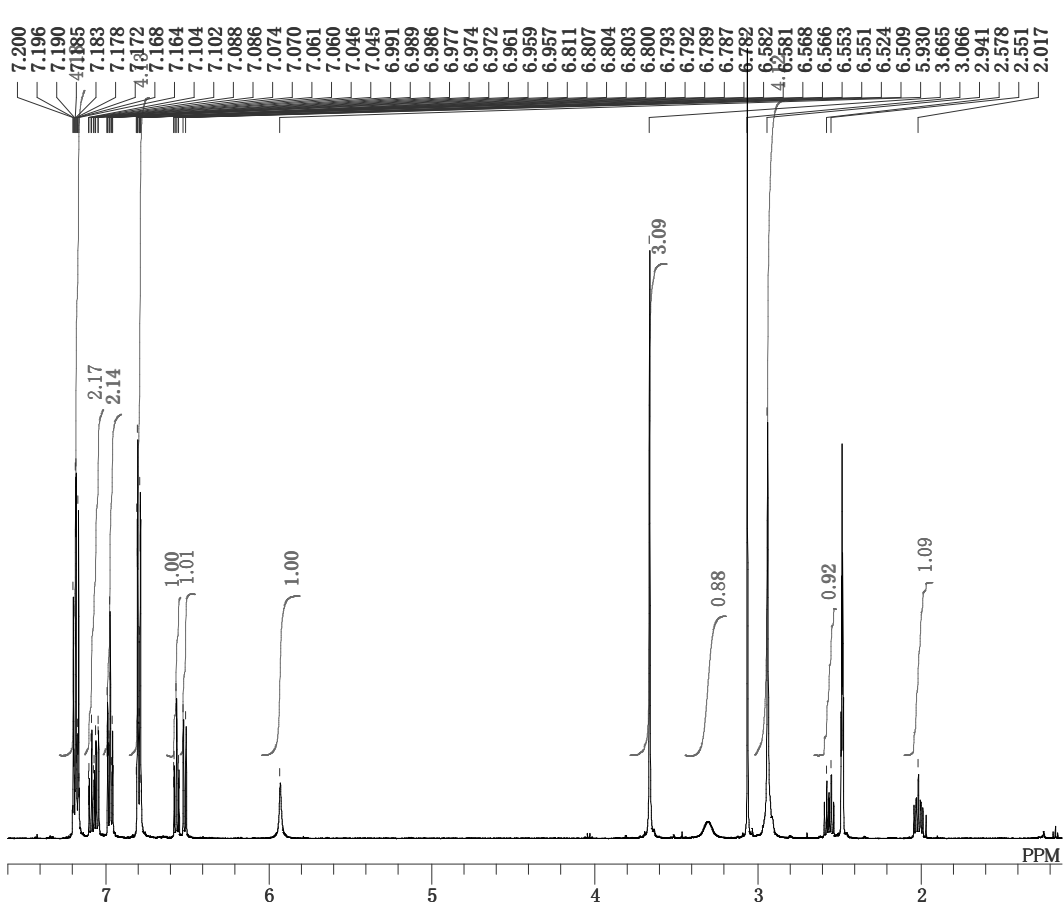

DFILE 11k H.als  
COMNT 11k H  
DATIM Sun Feb 23 04:37:15 2014  
OBNUC 1H  
EXMOD non  
OBFRQ 500.00 MHz  
OBSET 160.00 KHz  
OBFIN 2160.00 Hz  
POINT 32768  
FREQU 10000.00 Hz  
SCANS 16  
ACQTM 3.2768 sec  
PD 3.7232 sec  
PW1 5.00 usec  
IRNUC 1H  
CTEMP 80.0 c  
SLVNT DMSO  
EXREF 0.00 ppm  
BF 1.20 Hz  
RGAIN 21

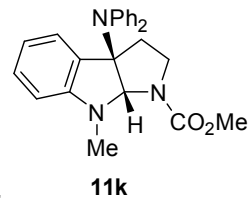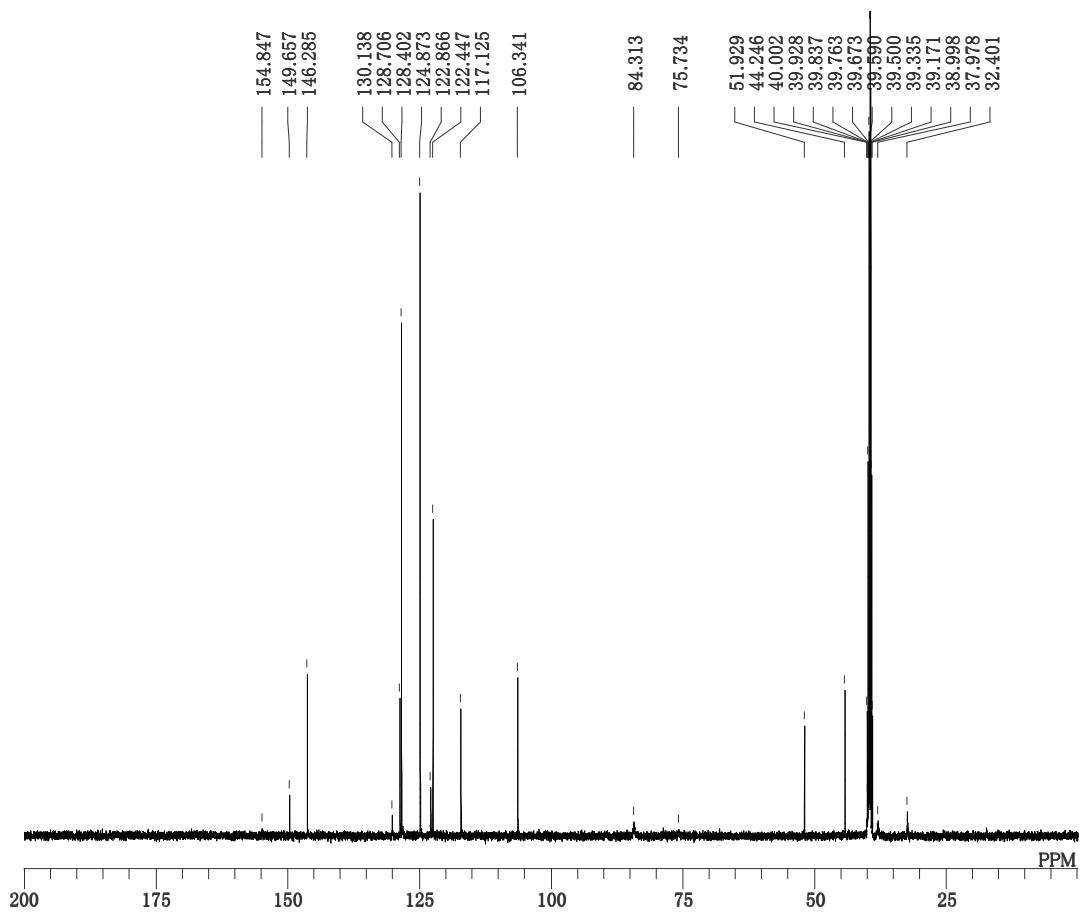

DFILE 11k C.als  
COMNT 11k C  
DATIM Sun Feb 23 05:42:27 2014  
OBNUC 13C  
EXMOD bcm  
OBFRQ 125.65 MHz  
OBSET 120.00 KHz  
OBFIN 7958.00 Hz  
POINT 32768  
FREQU 33898.30 Hz  
SCANS 1024  
ACQTM 0.9667 sec  
PD 2.0333 sec  
PW1 4.40 usec  
IRNUC 1H  
CTEMP 80.0 c  
SLVNT DMSO  
EXREF 39.50 ppm  
BF 0.12 Hz  
RGAIN 27

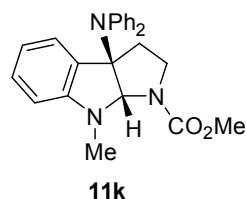



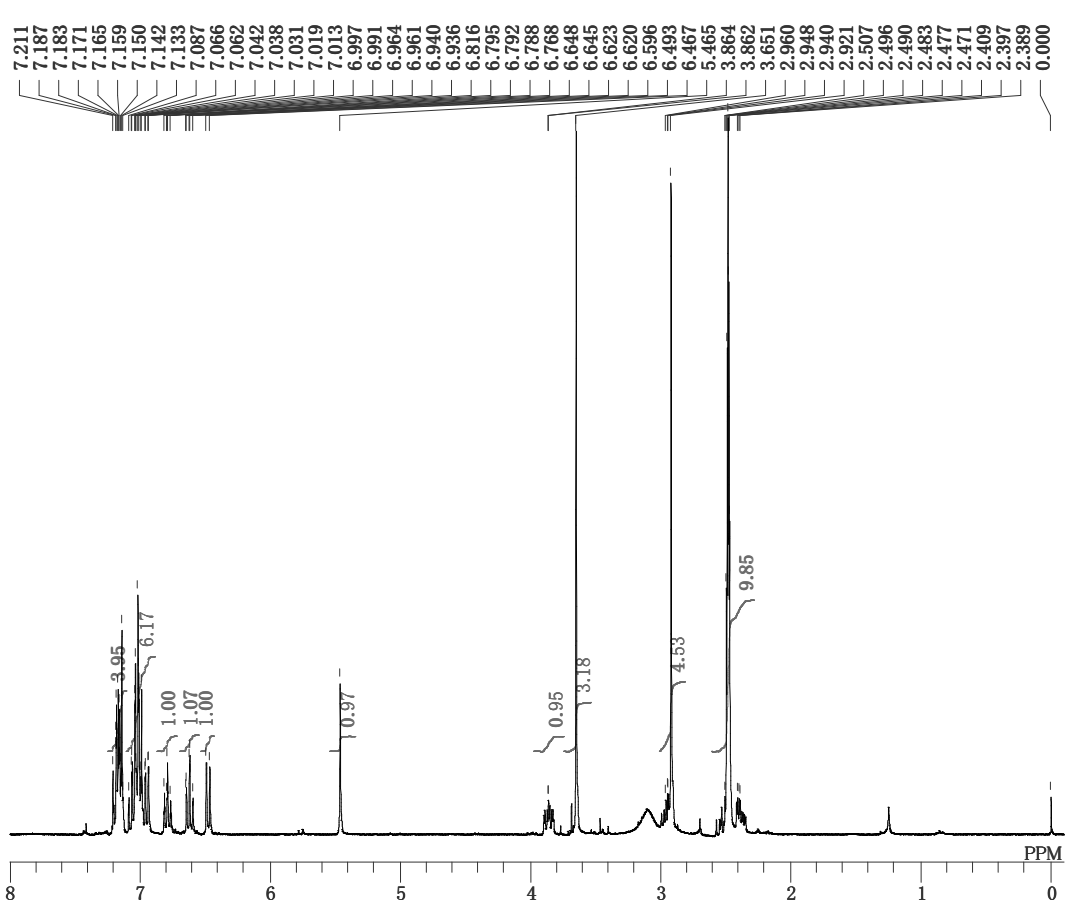

DFILE 11I H.als  
 COMNT 11I H  
 DATIM Mon Jan 19 17:03:00 2015  
 OBNUC 1H  
 EXMOD NON  
 OBFRQ 300.40 MHz  
 OBSET 130.00 KHz  
 OBFIN 1150.00 Hz  
 POINT 32768  
 FREQU 6006.01 Hz  
 SCANS 16  
 ACQTM 5.4559 sec  
 PD 1.5440 sec  
 PW1 5.30 usec  
 IRNUC 1H  
 CTEMP 80.5 c  
 SLVNT DMSO  
 EXREF 0.00 ppm  
 BF 0.12 Hz  
 RGAIN 18

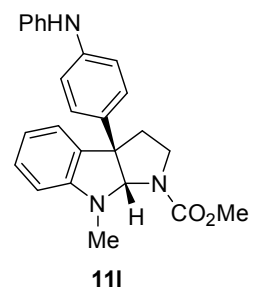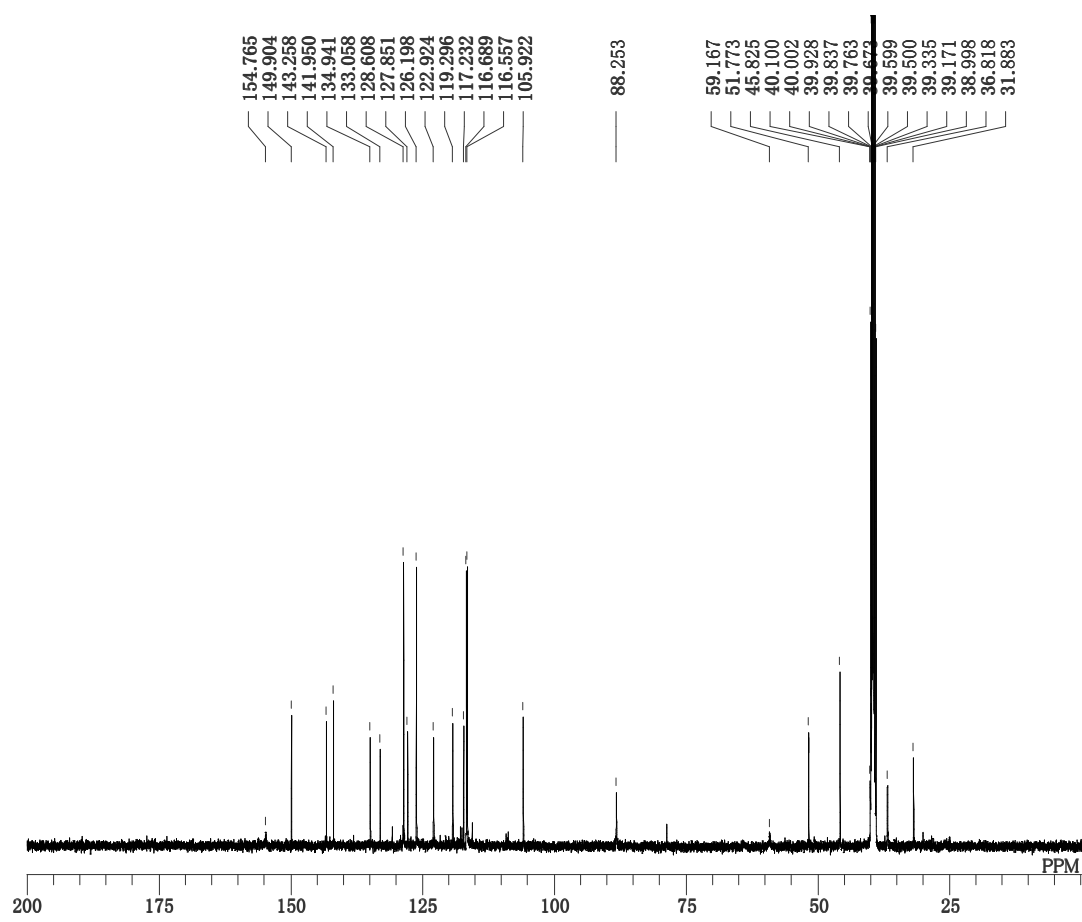

DFILE 11I C.als  
 COMNT 11I C  
 DATIM Sat Jan 10 14:47:44 2015  
 OBNUC 13C  
 EXMOD bcm  
 OBFRQ 125.65 MHz  
 OBSET 120.00 KHz  
 OBFIN 7958.00 Hz  
 POINT 32768  
 FREQU 33898.30 Hz  
 SCANS 10000  
 ACQTM 0.9667 sec  
 PD 2.0333 sec  
 PW1 4.40 usec  
 IRNUC 1H  
 CTEMP 79.9 c  
 SLVNT DMSO  
 EXREF 39.50 ppm  
 BF 1.20 Hz  
 RGAIN 27

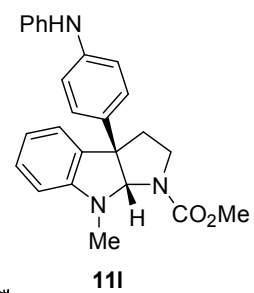

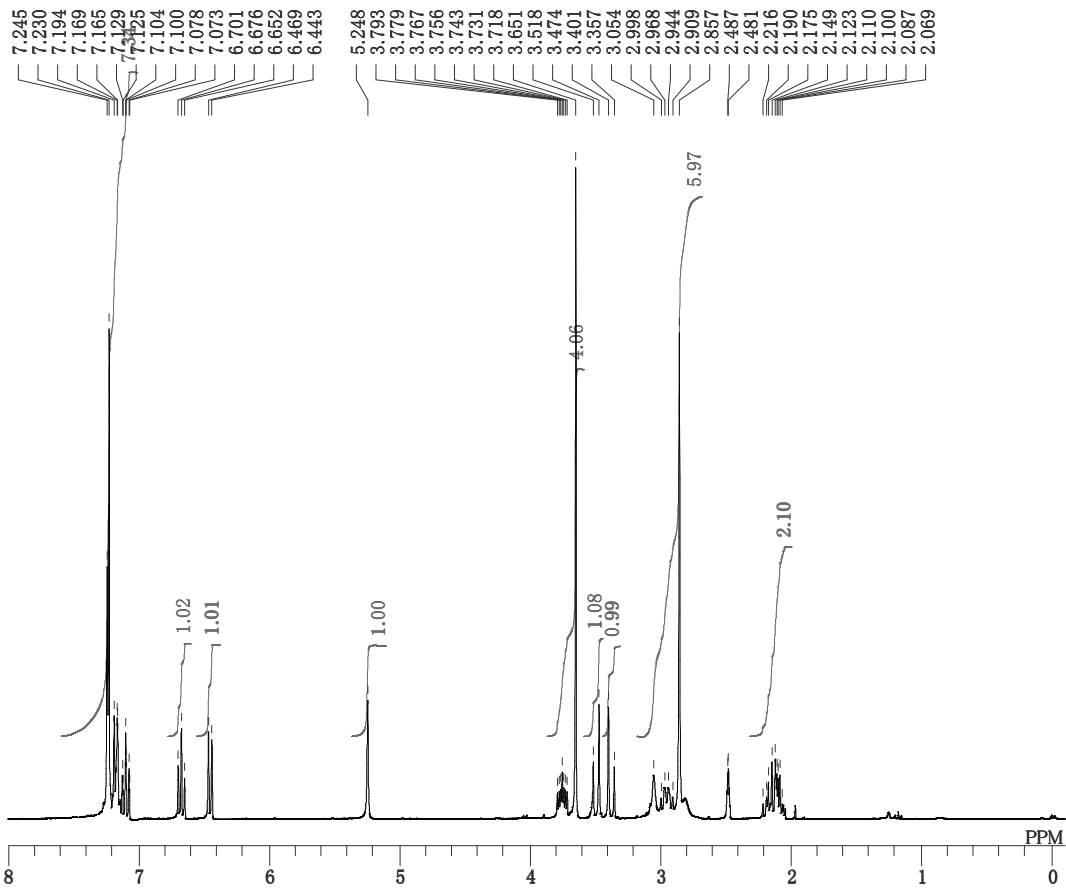

DFILE 11m H.als  
 COMNT 11m H  
 DATIM Sat Jan 11 10:22:01 2014  
 1H  
 EXMOD NON  
 OBFRQ 300.40 MHz  
 OBSET 130.00 KHz  
 OBFIN 1150.00 Hz  
 POINT 32768  
 FREQU 6006.01 Hz  
 SCANS 16  
 ACQTM 5.4559 sec  
 PD 1.5440 sec  
 PW1 5.30 usec  
 IRNUC 1H  
 CTEMP 81.0 c  
 SLVNT DMSO  
 EXREF 0.00 ppm  
 BF 0.12 Hz  
 RGAIN 14

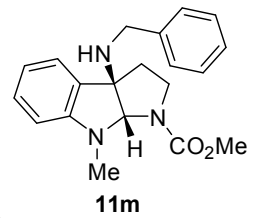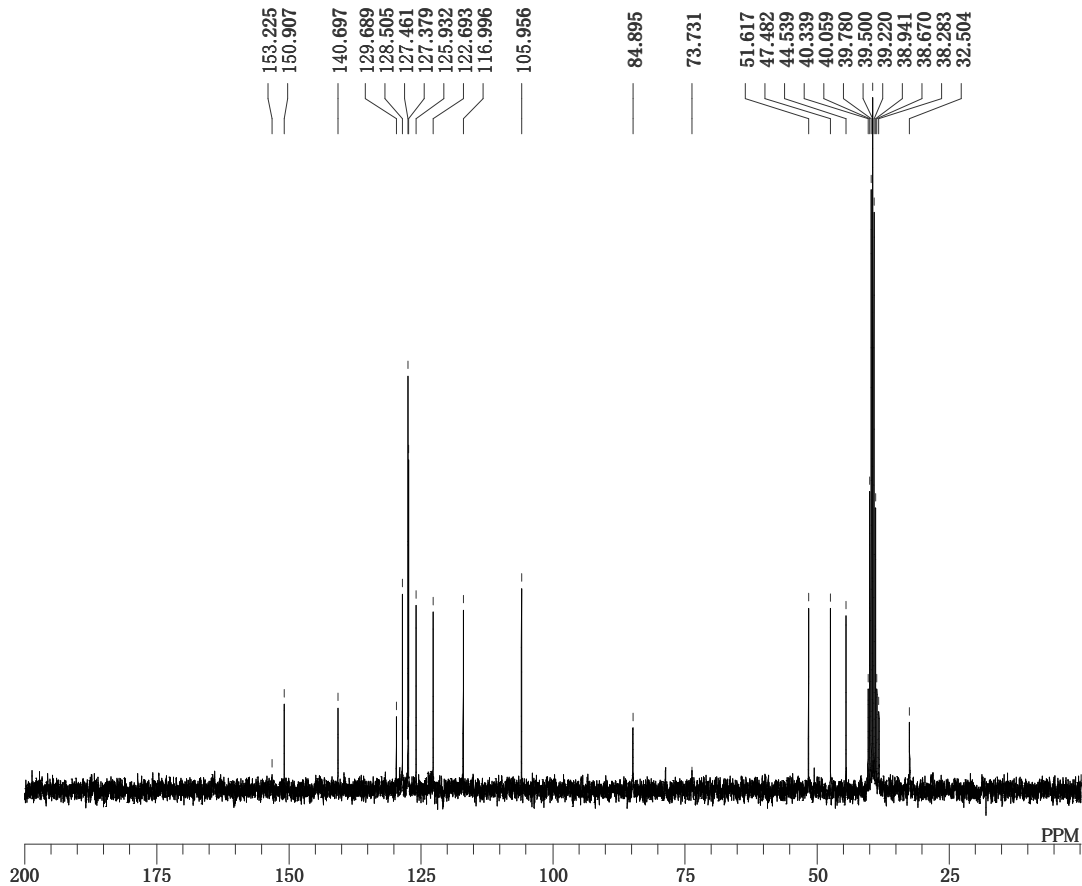

DFILE 11m C.als  
 COMNT 11m C  
 DATIM Fri Dec 06 10:07:00 2013  
 13C  
 EXMOD BCM  
 OBFRQ 75.45 MHz  
 OBSET 124.00 KHz  
 OBFIN 1840.00 Hz  
 POINT 32768  
 FREQU 20356.23 Hz  
 SCANS 400  
 ACQTM 1.6097 sec  
 PD 1.3900 sec  
 PW1 4.40 usec  
 IRNUC 1H  
 CTEMP 81.1 c  
 SLVNT DMSO  
 EXREF 39.50 ppm  
 BF 1.20 Hz  
 RGAIN 24

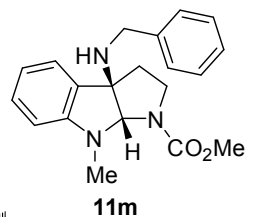

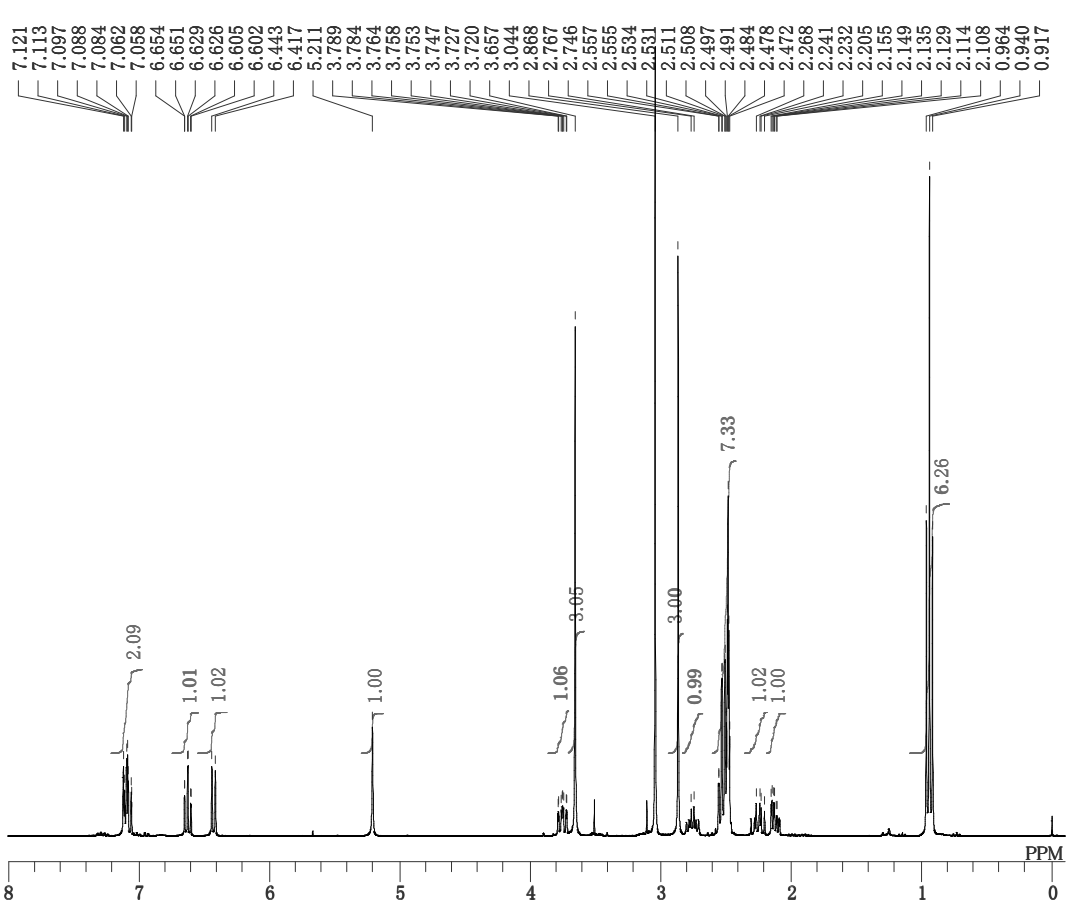

DFILE 11n H.als  
 COMINT 11n H  
 DATIM Thu Dec 26 10:36:31 2013  
 1H  
 OBNUC NON  
 EXMOD  
 OBFRQ 300.40 MHz  
 OBSET 130.00 KHz  
 OBFIN 1150.00 Hz  
 POINT 32768  
 FREQU 6006.01 Hz  
 SCANS 32  
 ACQTM 5.4559 sec  
 PD 1.5440 sec  
 PW1 5.30 usec  
 IRNUC 1H  
 CTEMP 81.0 c  
 SLVNT DMSO  
 EXREF 0.00 ppm  
 BF 0.12 Hz  
 RGAIN 17

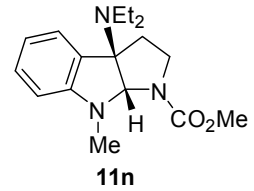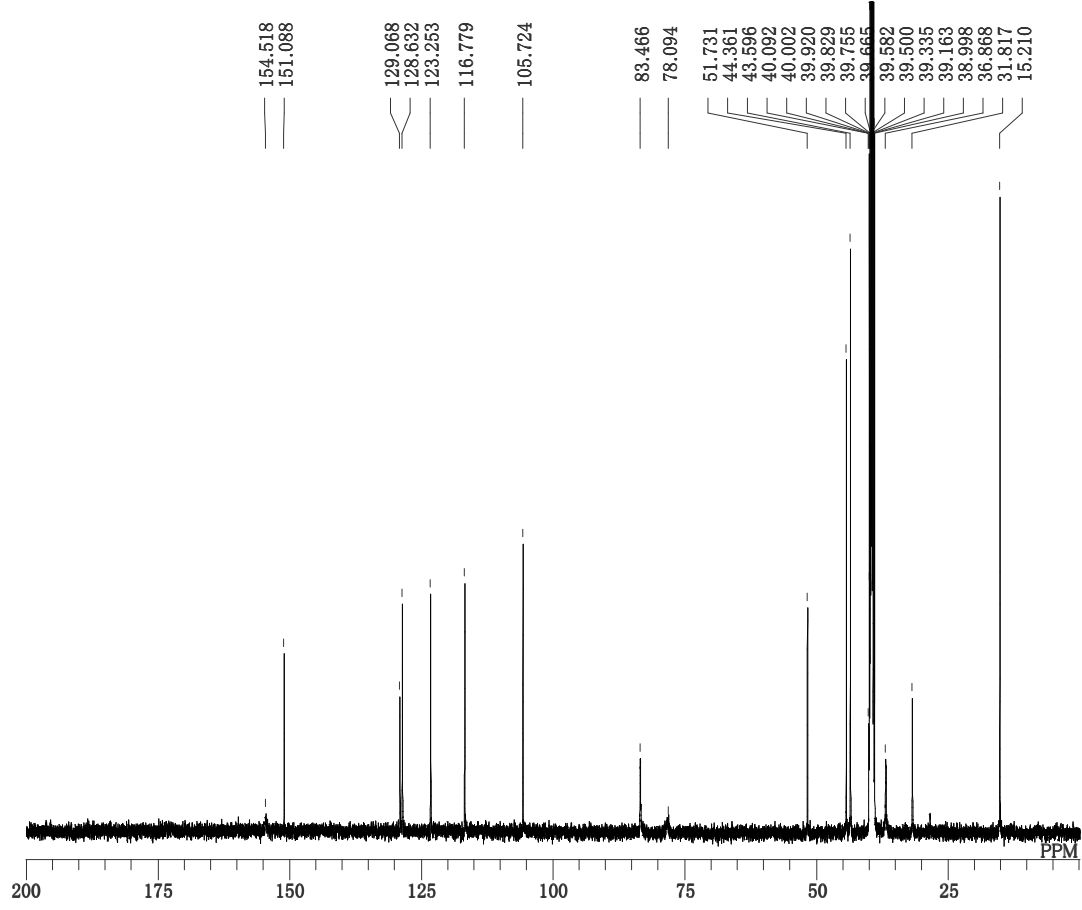

DFILE 11n C.als  
 COMINT 11n C  
 DATIM Mon Jan 5 14:31:45 2015  
 13C  
 OBNUC bcm  
 EXMOD  
 OBFRQ 125.65 MHz  
 OBSET 120.00 KHz  
 OBFIN 7958.00 Hz  
 POINT 32768  
 FREQU 33898.30 Hz  
 SCANS 12000  
 ACQTM 0.9667 sec  
 PD 2.0333 sec  
 PW1 4.40 usec  
 IRNUC 1H  
 CTEMP 80.0 c  
 SLVNT DMSO  
 EXREF 39.50 ppm  
 BF 1.20 Hz  
 RGAIN 27

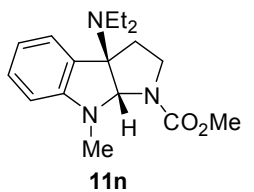

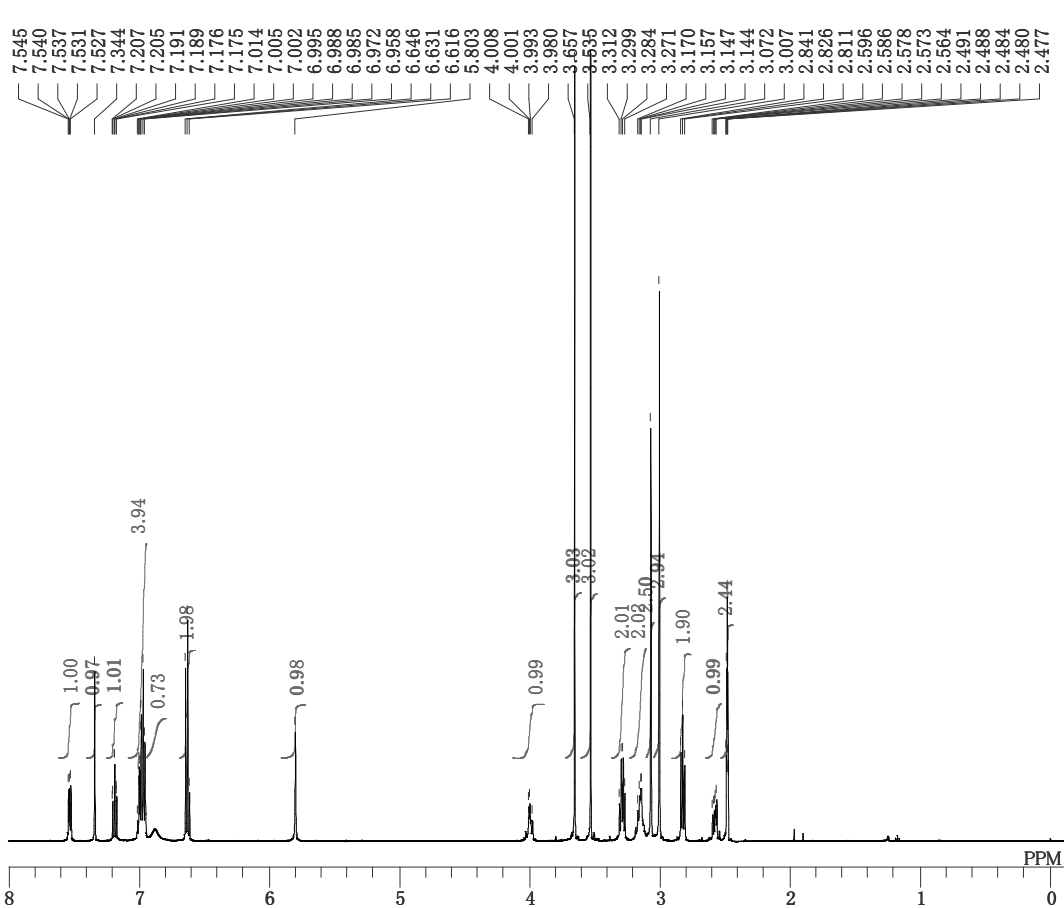

DFILE 11o H.als  
COMNT 11o H  
DATIM Mon Jan 21 19:50:22 2013  
OBNUC 1H  
EXMOD non  
OBFRQ 500.00 MHz  
OBSET 160.00 KHz  
OBFIN 2160.00 Hz  
POINT 32768  
FREQU 10000.00 Hz  
SCANS 16  
ACQTM 3.2768 sec  
PD 3.7232 sec  
PW1 6.40 usec  
IRNUC 1H  
CTEMP 80.0 c  
SLVNT DMSO  
EXREF 0.00 ppm  
BF 0.12 Hz  
RGAIN 23

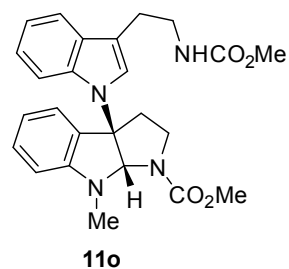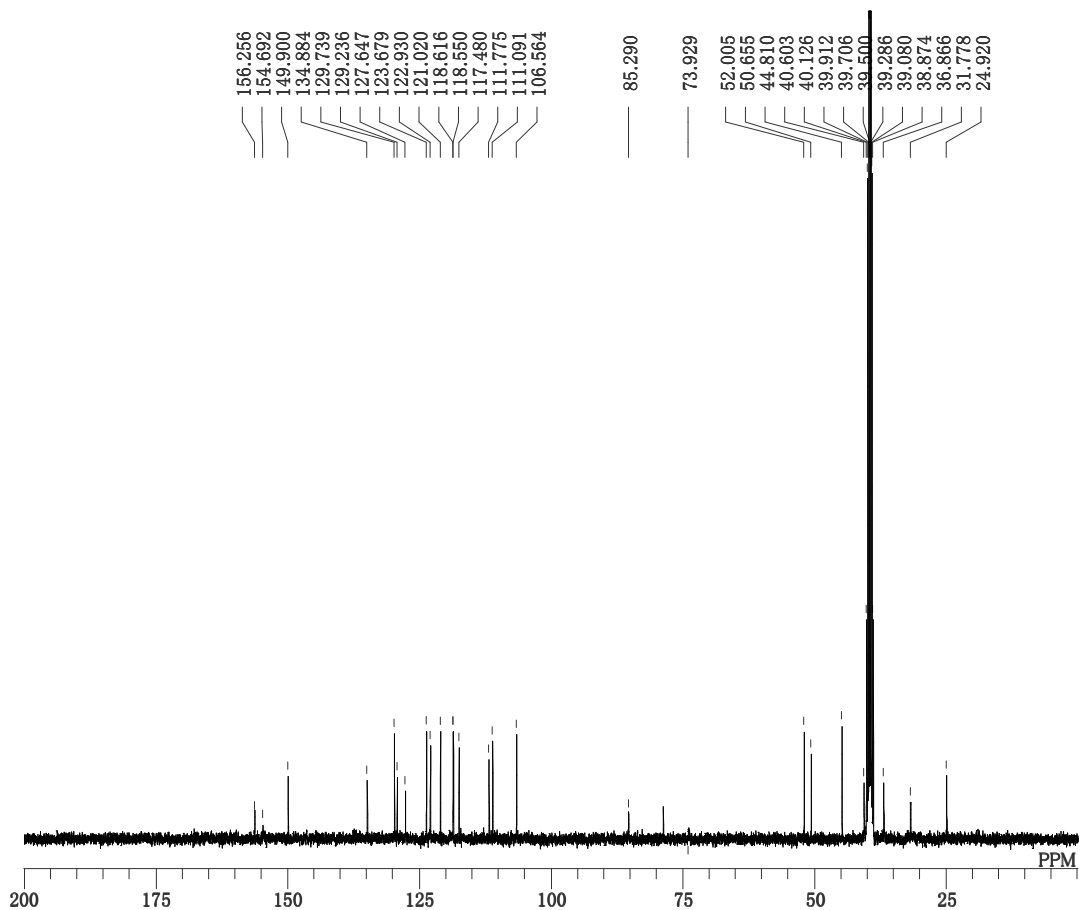

DFILE 11o C.als  
COMNT 11o C  
DATIM Thu Jan 31 00:27:48 2013  
OBNUC 13C  
EXMOD BCM  
OBFRQ 100.40 MHz  
OBSET 125.00 KHz  
OBFIN 10500.00 Hz  
POINT 32768  
FREQU 27118.64 Hz  
SCANS 3200  
ACQTM 1.2083 sec  
PD 1.7920 sec  
PW1 6.00 usec  
IRNUC 1H  
CTEMP 80.2 c  
SLVNT DMSO  
EXREF 39.50 ppm  
BF 1.20 Hz  
RGAIN 24

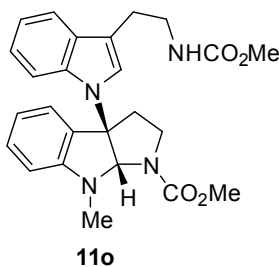

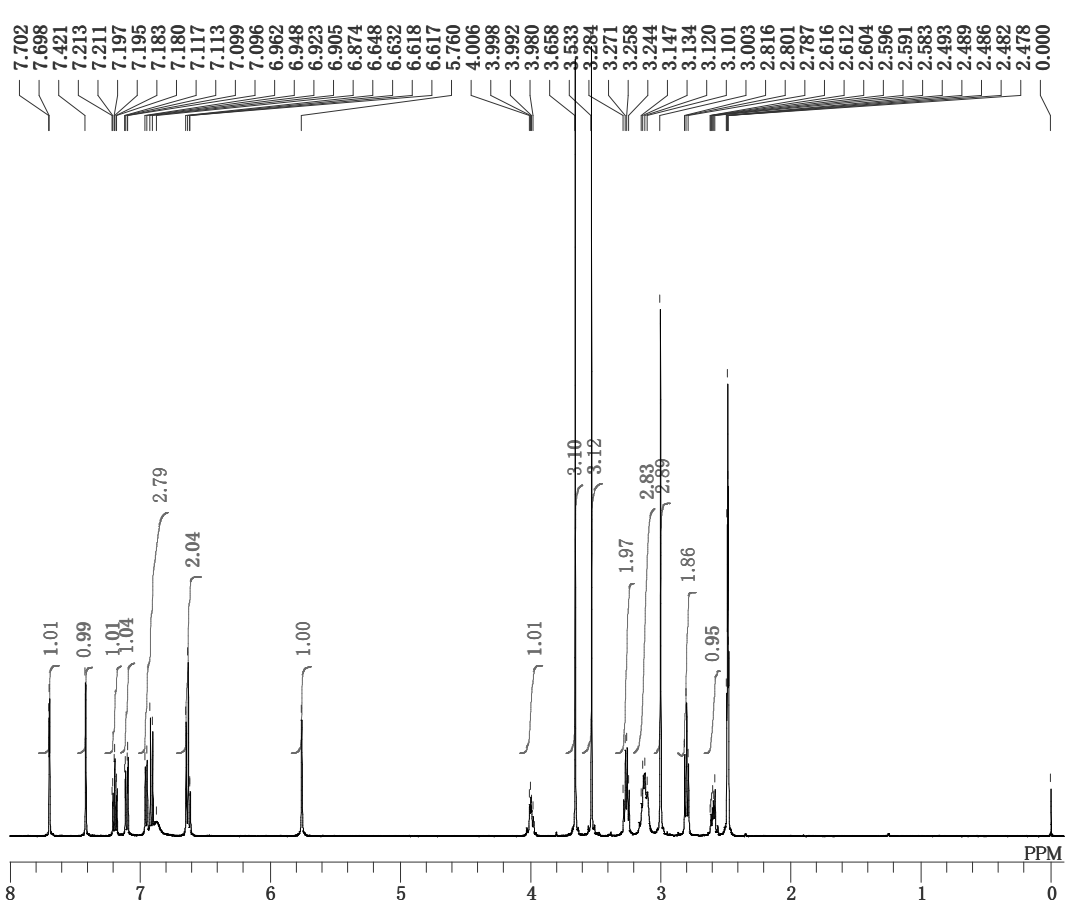

DFILE 11p H.als  
 COMNT 11p H  
 DATIM Wed Dec 31 06:36:02 2014  
 OBNUC 1H  
 EXMOD non  
 OBFRQ 500.00 MHz  
 OBSET 160.00 KHz  
 OBFIN 2160.00 Hz  
 POINT 32768  
 FREQU 10000.00 Hz  
 SCANS 16  
 ACQTM 3.2768 sec  
 PD 3.7232 sec  
 PW1 5.00 usec  
 IRNUC 1H  
 CTEMP 79.9 c  
 SLVNT DMSO  
 EXREF 0.00 ppm  
 BF 0.12 Hz  
 RGAIN 24

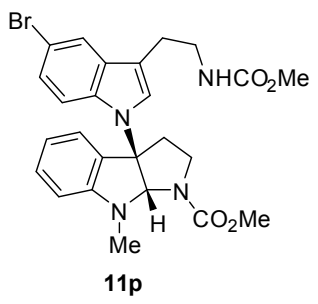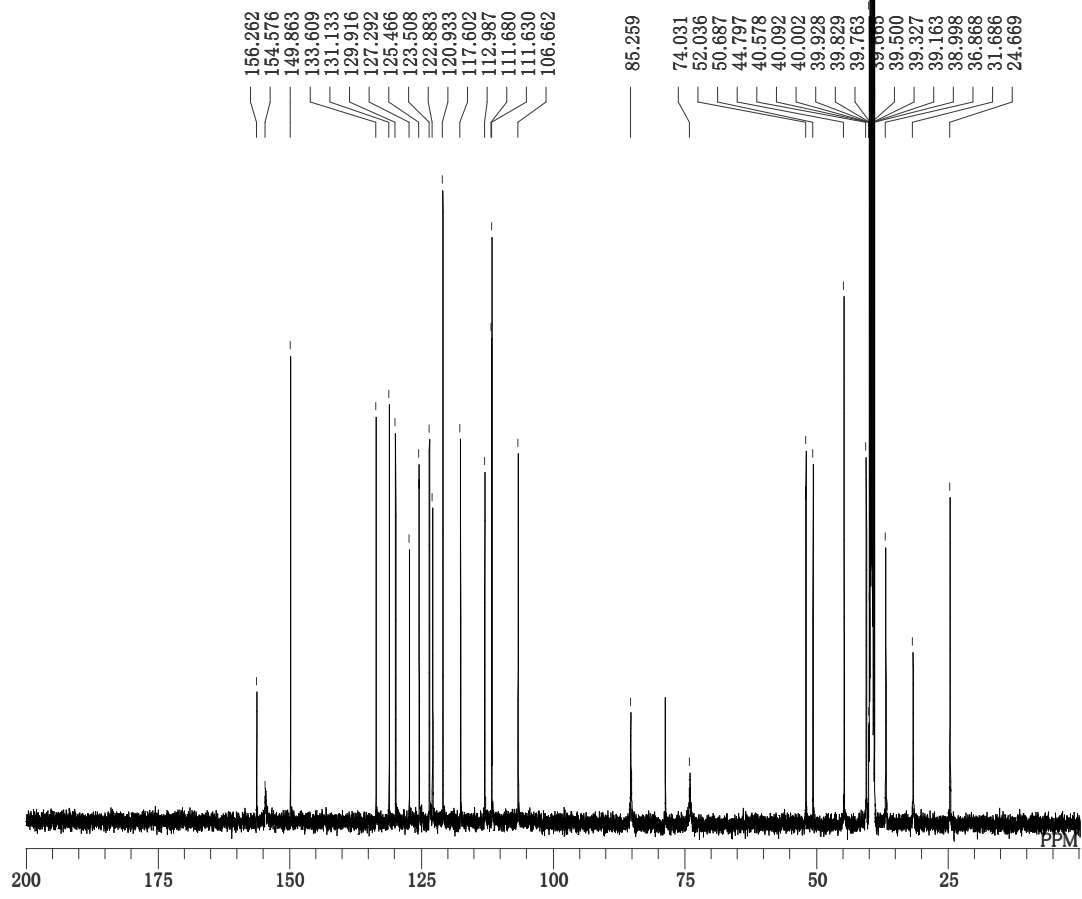

DFILE 11p C.als  
 COMNT 11p C  
 DATIM Wed Dec 31 14:57:20 2014  
 OBNUC 13C  
 EXMOD bcm  
 OBFRQ 125.65 MHz  
 OBSET 120.00 KHz  
 OBFIN 7958.00 Hz  
 POINT 32768  
 FREQU 33898.30 Hz  
 SCANS 10000  
 ACQTM 0.9667 sec  
 PD 2.0333 sec  
 PW1 4.40 usec  
 IRNUC 1H  
 CTEMP 80.0 c  
 SLVNT DMSO  
 EXREF 39.50 ppm  
 BF 0.12 Hz  
 RGAIN 27

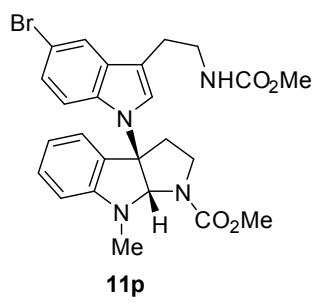

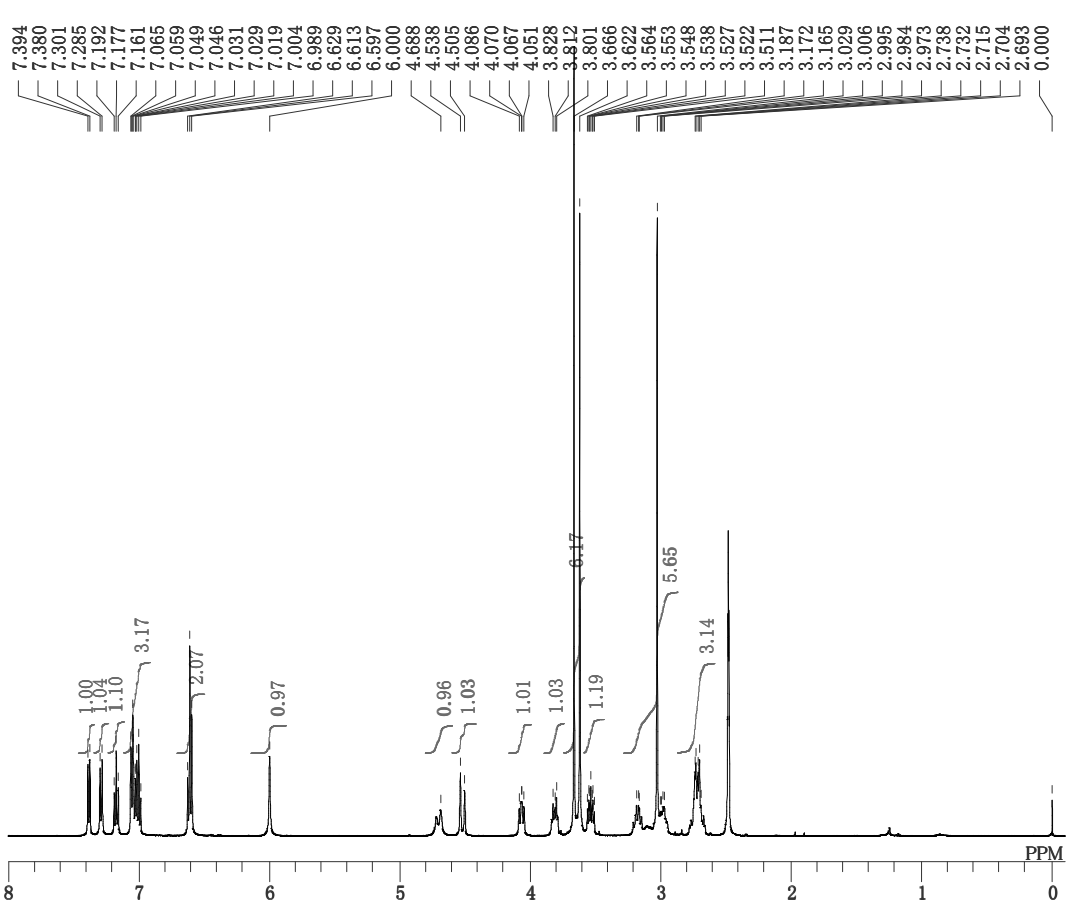

DFILE 11q H.als  
 COMNT 11q H  
 DATIM Tue Nov 25 23:09:21 2014  
 1H  
 EXMOD non  
 OBFRQ 500.00 MHz  
 OBSET 160.00 KHz  
 OBFIN 2160.00 Hz  
 POINT 32768  
 FREQU 10000.00 Hz  
 SCANS 8  
 ACQTM 3.2768 sec  
 PD 3.7232 sec  
 PW1 5.00 usec  
 IRNUC 1H  
 CTEMP 80.1 c  
 SLVNT DMSO  
 EXREF 0.00 ppm  
 BF 0.09 Hz  
 RGAIN 19

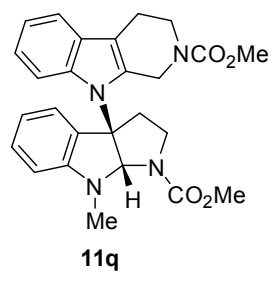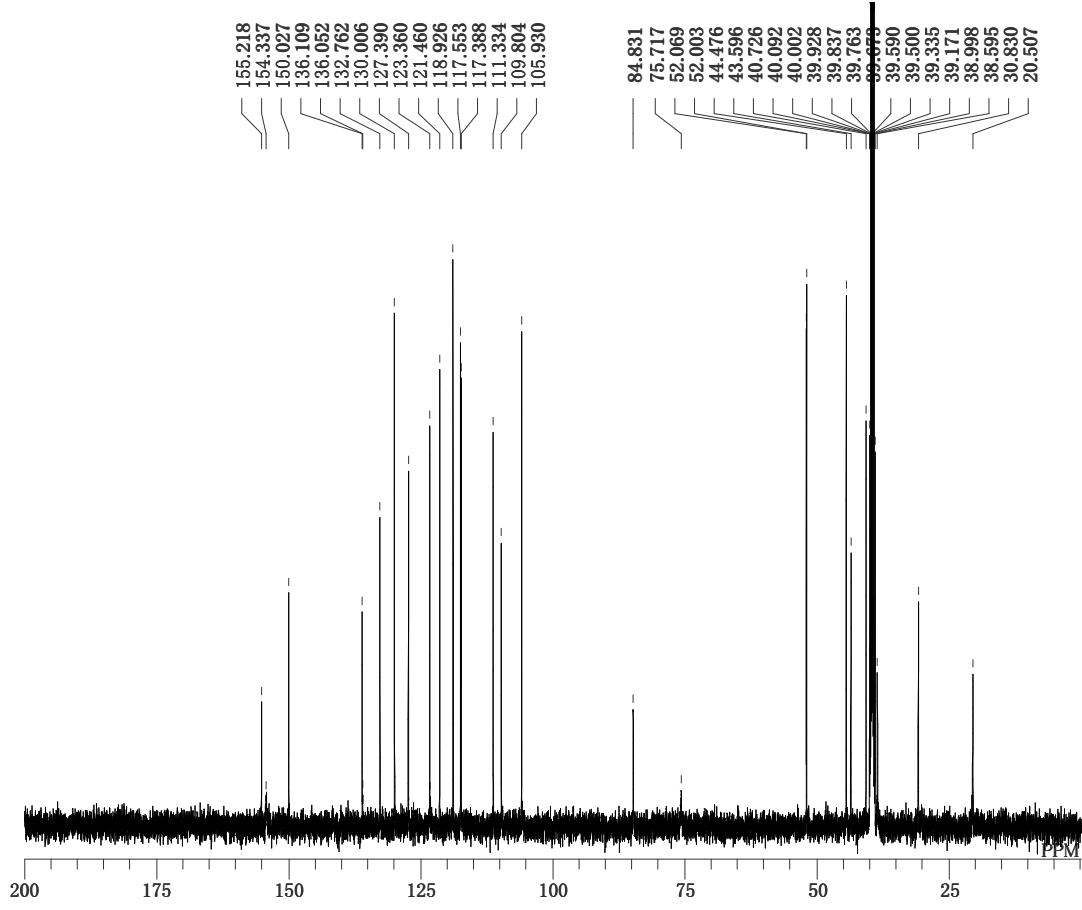

DFILE 11q C.als  
 COMNT 11q C  
 DATIM Wed Nov 26 00:01:45 2014  
 13C  
 EXMOD bcm  
 OBFRQ 125.65 MHz  
 OBSET 120.00 KHz  
 OBFIN 7958.00 Hz  
 POINT 32768  
 FREQU 33898.30 Hz  
 SCANS 1024  
 ACQTM 0.9667 sec  
 PD 2.0333 sec  
 PW1 4.40 usec  
 IRNUC 1H  
 CTEMP 80.0 c  
 SLVNT DMSO  
 EXREF 39.50 ppm  
 BF 0.12 Hz  
 RGAIN 27

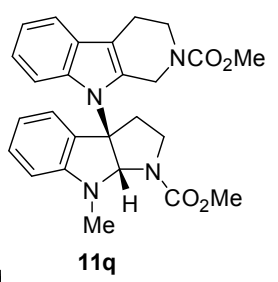

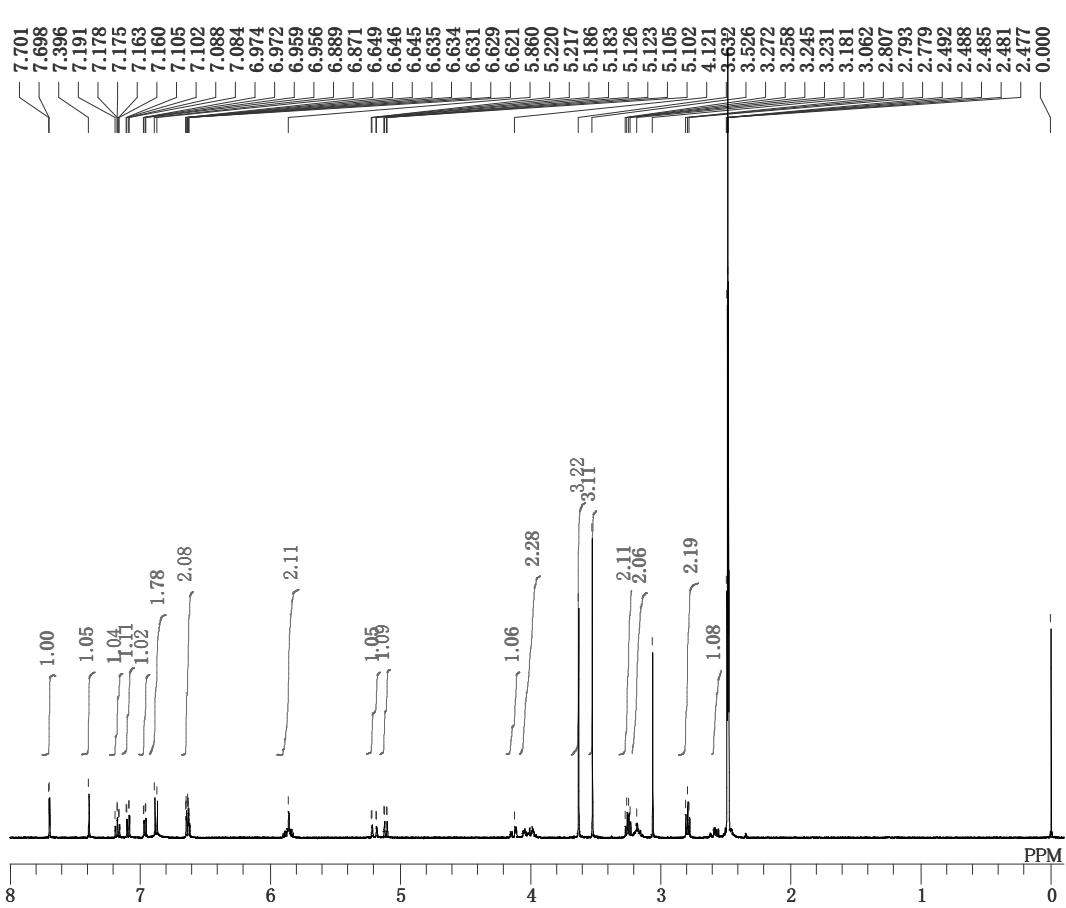

DFILE 11r H.als  
COMNT 11r H  
DATIM Sun Dec 16 18:55:23 2012  
OBNUC 1H  
EXMOD non  
OBFRQ 500.00 MHz  
OBSET 160.00 KHz  
OBFIN 2160.00 Hz  
POINT 32768  
FREQU 10000.00 Hz  
SCANS 8  
ACQTM 3.2768 sec  
PD 3.7232 sec  
PW1 6.40 usec  
IRNUC 1H  
CTEMP 80.0 c  
SLVNT DMSO  
EXREF 0.00 ppm  
BF 0.01 Hz  
RGAIN 25

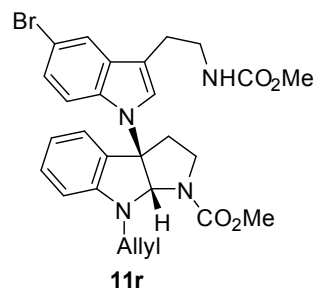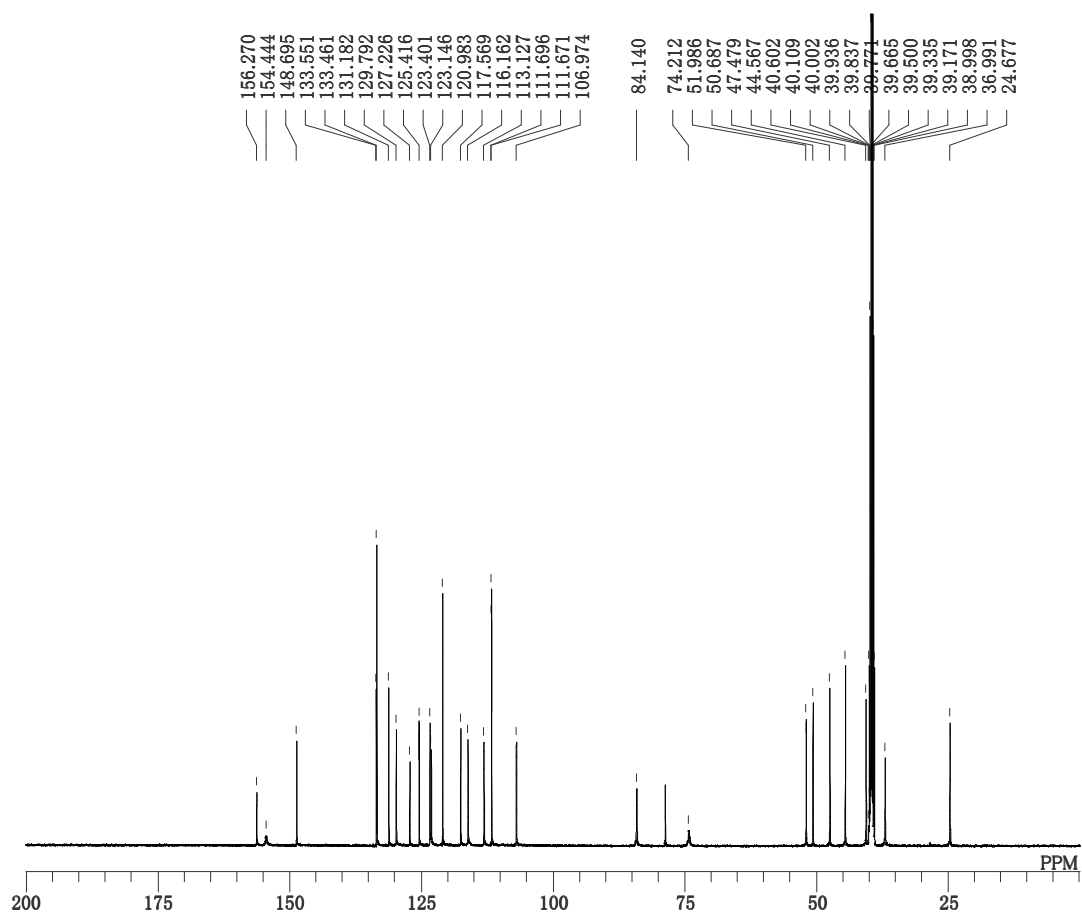

DFILE 11r C.als  
COMNT 11r C  
DATIM Sat Jan 3 14:12:06 2015  
OBNUC 13C  
EXMOD bcm  
OBFRQ 125.65 MHz  
OBSET 120.00 KHz  
OBFIN 7958.00 Hz  
POINT 32768  
FREQU 33898.30 Hz  
SCANS 70000  
ACQTM 0.9667 sec  
PD 2.0333 sec  
PW1 4.40 usec  
IRNUC 1H  
CTEMP 80.0 c  
SLVNT DMSO  
EXREF 39.50 ppm  
BF 0.09 Hz  
RGAIN 28

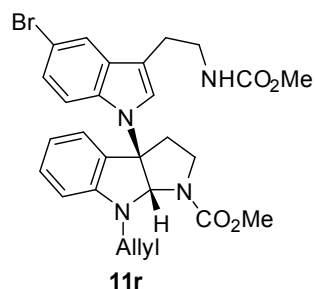

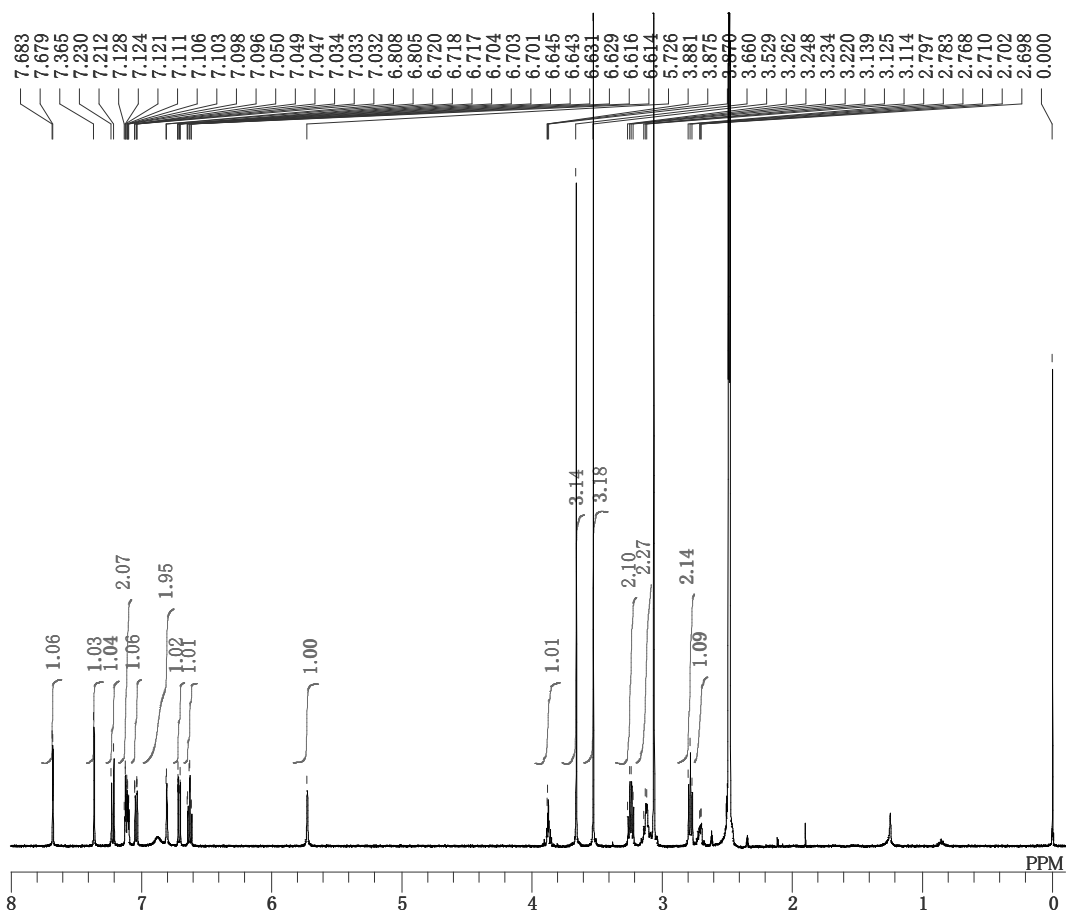

DFILE 11s H.als  
 COMNT 11s H  
 DATIM Wed Jan 7 02:06:22 2015  
 OBNUC 1H  
 EXMOD non  
 OBFRQ 500.00 MHz  
 OBSET 160.00 KHz  
 OBFIN 2160.00 Hz  
 POINT 32768  
 FREQU 10000.00 Hz  
 SCANS 32  
 ACQTM 3.2768 sec  
 PD 3.7232 sec  
 PW1 5.00 usec  
 IRNUC 1H  
 CTEMP 79.9 c  
 SLVNT DMSO  
 EXREF 0.00 ppm  
 BF 0.12 Hz  
 RGAIN 26

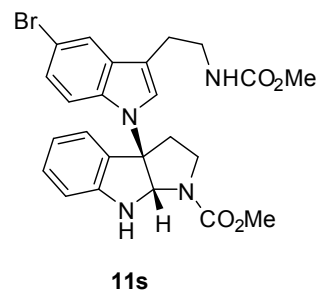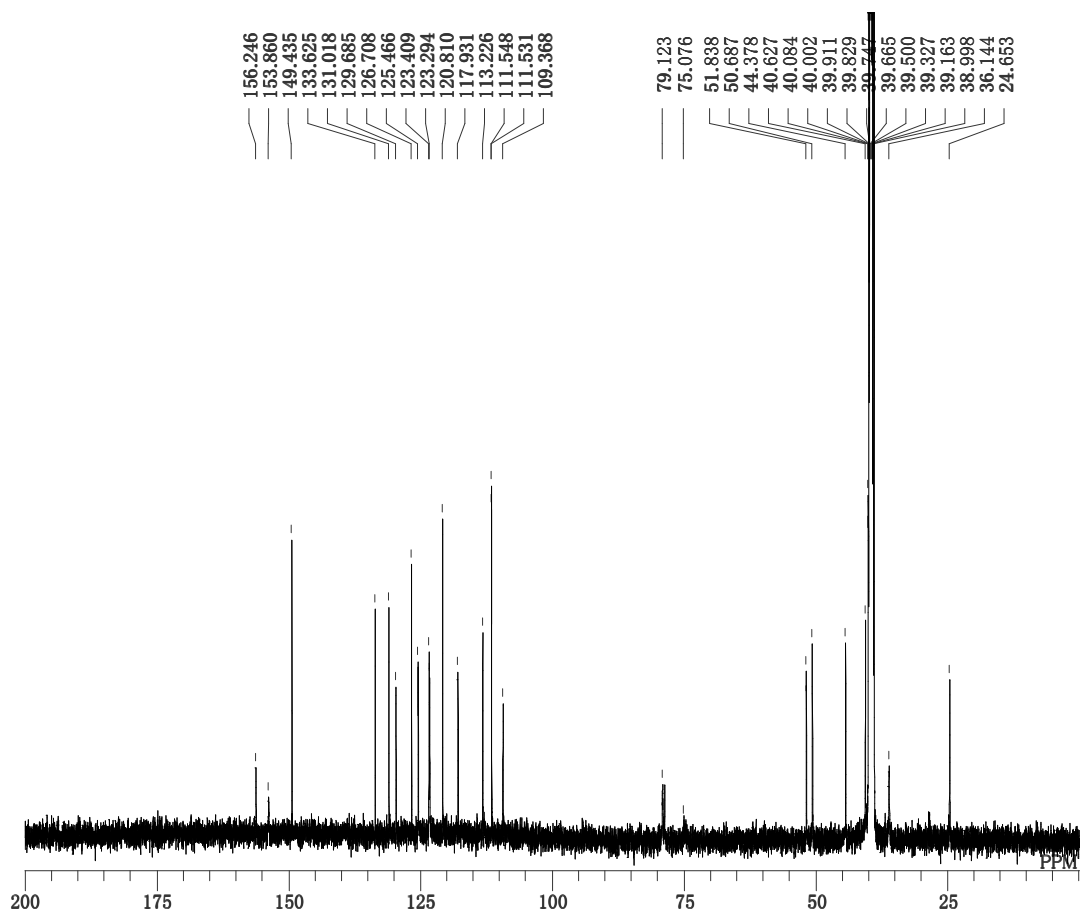

DFILE 11s C.als  
 COMNT 11s C  
 DATIM Thu Jan 8 19:47:51 2015  
 OBNUC 13C  
 EXMOD bcm  
 OBFRQ 125.65 MHz  
 OBSET 120.00 KHz  
 OBFIN 7958.00 Hz  
 POINT 32768  
 FREQU 33898.30 Hz  
 SCANS 50000  
 ACQTM 0.9667 sec  
 PD 2.0333 sec  
 PW1 4.40 usec  
 IRNUC 1H  
 CTEMP 79.9 c  
 SLVNT DMSO  
 EXREF 39.50 ppm  
 BF 1.20 Hz  
 RGAIN 27

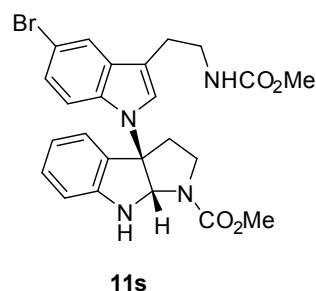



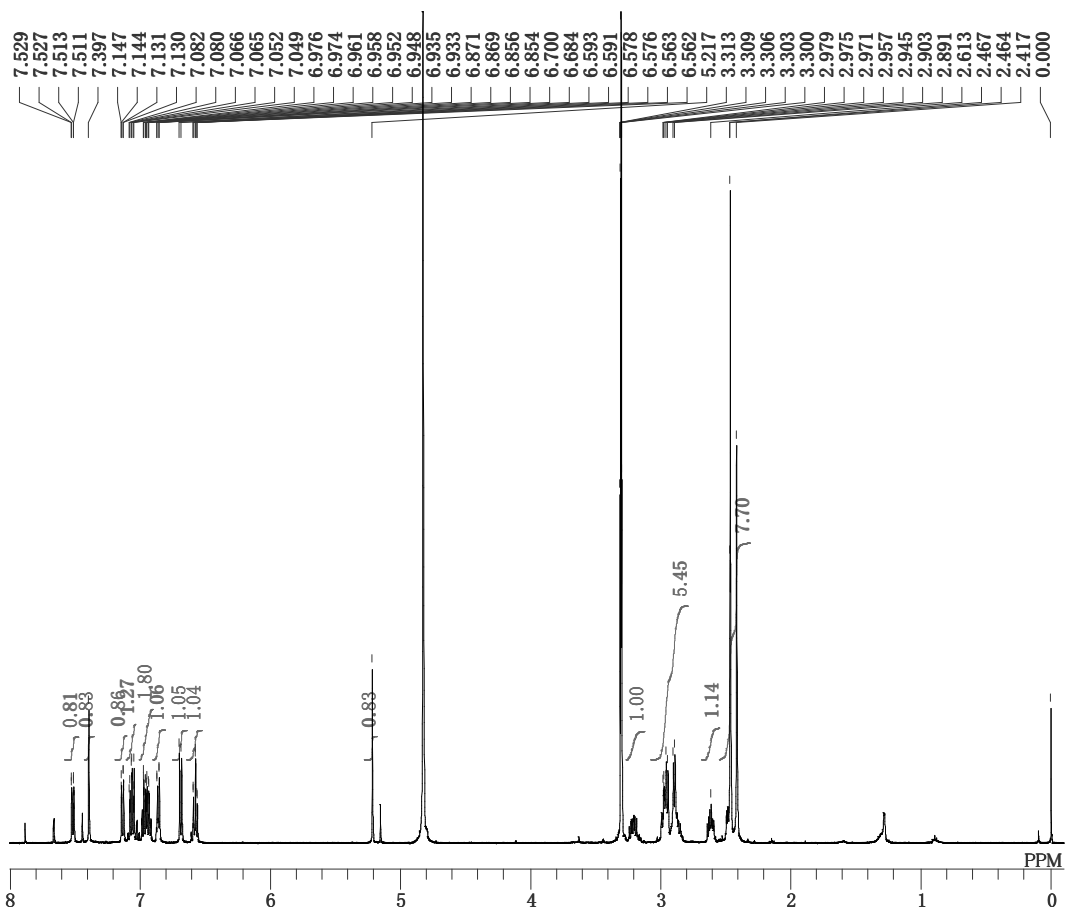

DFILE 9 H.als  
 COMNT 9 H  
 DATIM Wed Jan 7 01:34:03 2015  
 OBNUC 1H  
 EXMOD non  
 OBFRQ 500.00 MHz  
 OBSET 160.00 KHz  
 OBFIN 2160.00 Hz  
 POINT 32768  
 FREQU 10000.00 Hz  
 SCANS 16  
 ACQTM 3.2768 sec  
 PD 3.7232 sec  
 PW1 5.00 usec  
 IRNUC 1H  
 CTEMP 27.9 c  
 SLVNT CD3OD  
 EXREF 0.00 ppm  
 BF 0.12 Hz  
 RGAIN 22

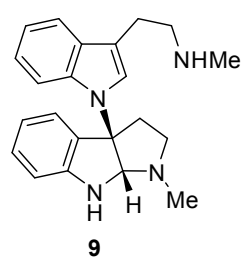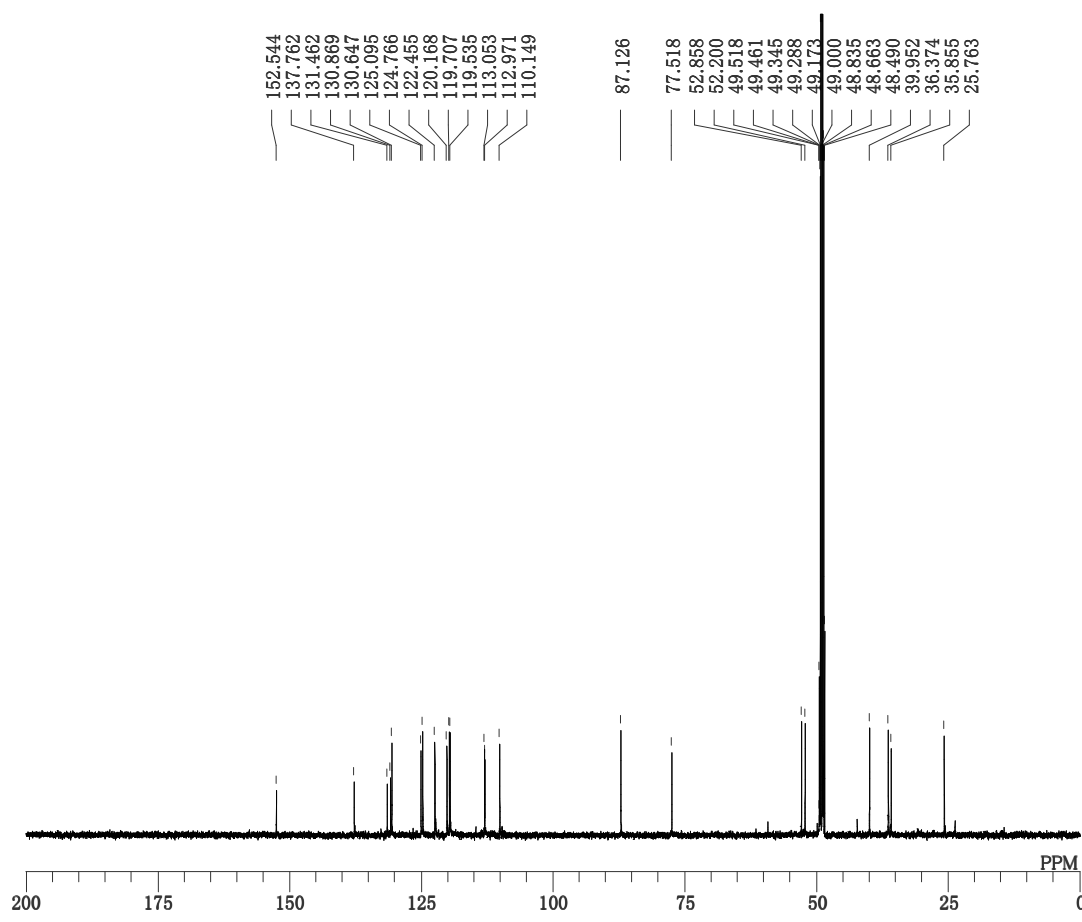

DFILE 9 C.als  
 COMNT 9 C  
 DATIM Fri May 10 14:44:13 2013  
 OBNUC 13C  
 EXMOD bcm  
 OBFRQ 125.65 MHz  
 OBSET 120.00 KHz  
 OBFIN 7958.00 Hz  
 POINT 32768  
 FREQU 33898.30 Hz  
 SCANS 800  
 ACQTM 0.9667 sec  
 PD 2.0333 sec  
 PW1 11.75 usec  
 IRNUC 1H  
 CTEMP 27.9 c  
 SLVNT CD3OD  
 EXREF 49.00 ppm  
 BF 1.20 Hz  
 RGAIN 27

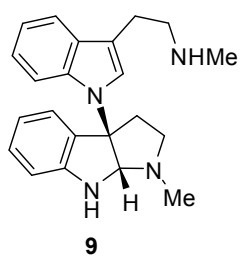

Supplement: c5ob00190k1.pdf [file c5ob00190k1.pdf]
